1 **Title: Environmental conditions and diffusion-limited microbial transfer drive specific**  
2 **microbial communities detected at different sections in oil-production reservoir with**  
3 **water-flooding**

4 **Running title:** Microbial communities in oilfield-production facility

5

6 Peike Gao<sup>a\*</sup>, Huimei Tian<sup>b</sup>, Guoqiang Li<sup>c</sup>, Feng Zhao<sup>a</sup>, Wenjie Xia<sup>c</sup>, Ji-Dong Gu<sup>d</sup>, Jianjun Le<sup>e</sup>,  
7 Ting Ma<sup>c\*</sup>

8

9 <sup>a</sup> College of Life Sciences, Qufu Normal University, Qufu, Shandong, 273165, The People's  
10 Republic of China;

11 <sup>b</sup> College of Forestry, Shandong Agricultural University, Tai'an, Shandong, 271018, The  
12 People's Republic of China;

13 <sup>c</sup> College of Life Sciences, Nankai University, Tianjin, 300071, The People's Republic of  
14 China;

15 <sup>d</sup> Environmental Engineering, Guangdong Technion - Israel Institute of Technology, 241  
16 Daxue Road, Shantou, Guangdong, 515063, The People's Republic of China;

17 <sup>e</sup> Exploration and Development Research Institute, PetroChina Daqing Oilfield Limited  
18 Company, Daqing, Heilongjiang, 163000, The People's Republic of China

19

20 **\*Corresponding authors:** Peike Gao, College of Life Sciences, Qufu Normal University,  
21 Qufu, Shandong, P. R. China. Tel: 86-537-4456134. E-mail: gpkyl-001@163.com. Orcid:  
22 0000-0002-0320-8187. Ting Ma, College of Life Sciences, Nankai University, Tianjin, P. R.  
23 China. Tel: 86-22-23498185. E-mail: tingma@nankai.edu.cn

24 **ABSTRACT** This study investigated the distribution of microbial communities in the oilfield  
25 production facilities of a water-flooding petroleum reservoir and the roles of environmental  
26 variation, microorganisms in injected water, and diffusion-limited microbial transfer in  
27 structuring the microbial communities. Similar bacterial communities were observed in  
28 surface water-injection facilities dominated by aerobic or facultative anaerobic  
29 Betaproteobacteria, Alphaproteobacteria, and Flavobacteria. Distinct bacterial communities  
30 were observed in downhole of the water-injection wells dominated by Clostridia,  
31 Deltaproteobacteria, Anaerolineae, and Synergistia, and in the oil-production wells dominated  
32 by Gammaproteobacteria, Betaproteobacteria, and Epsilonproteobacteria. *Methanosaeta*,  
33 *Methanobacterium*, and *Methanolinea* were dominant archaeal taxa in the water-injection  
34 facilities, while the oil-production wells were predominated by *Methanosaeta*,  
35 *Methanomethylovorans*, and *Methanocalculus*. Energy, nucleotide, translation, and glycan  
36 biosynthesis metabolisms were more active in the downhole of the water-injection wells,  
37 while bacterial chemotaxis, biofilm formation, two-component system, and xenobiotic  
38 biodegradation was associated with the oil-production wells. The number of shared OTUs  
39 and its positive correlation with formation permeability revealed differential diffusion-limited  
40 microbial transfer in oil-production facilities. The overall results indicate that environmental  
41 variation and microorganisms in injected water are the determinants that structure microbial  
42 communities in water-injection facilities, and the determinants in oil-bearing strata are  
43 environmental variation and diffusion-limited microbial transfer.

44 **IMPORTANCE** Water-flooding continually inoculates petroleum reservoirs with exogenous  
45 microorganisms, nutrients, and oxygen. However, how this process influences the subsurface  
46 microbial community of the whole production process remains unclear. In this study, we  
47 investigated the spatial distribution of microbial communities in the oilfield production  
48 facilities of a water-flooding petroleum reservoir, and comprehensively illustrate the roles of

49 environmental variation, microorganisms in injected water, and diffusion-limited microbial  
50 transfer in structuring the microbial communities. The results advance fundamental  
51 understanding on petroleum reservoir ecosystems that subjected to anthropogenic  
52 perturbations during oil production processes.

53 **KEYWORDS** Environmental selection · Metabolic profiles · Oilfield production  
54 facilities · Petroleum reservoir

## 55 INTRODUCTION

56 Petroleum reservoirs contain microorganisms with diverse phylogenetic affiliations and  
57 metabolic characteristics, including hydrocarbon-degrading bacteria, fermentative bacteria,  
58 sulfate-reducing bacteria, iron-reducing bacteria, acetogens, and methanogens, among others  
59 (1, 2). The main microbial processes prevailing in petroleum reservoir ecosystems include  
60 hydrocarbon degradation, nitrate reduction, sulfate reduction, fermentation, acetogenesis,  
61 methanogenesis, and iron and manganese reduction (3, 4). With the increasing global demand  
62 for crude oil, research in the field of petroleum reservoir microbial communities has attracted  
63 increasing attention due to its great potential in improving oil production processes, such as  
64 microbiologically enhanced oil recovery (5-11) and microbiologically-prevented reservoir  
65 souring and equipment corrosion (12-16).

66 In recent decades, a large number of studies have investigated the composition of microbial  
67 communities in global petroleum reservoirs (17-21). Given the pronounced differences in  
68 inherent conditions among the reservoirs, in particular key microbial growth limiting factors,  
69 such as temperature (13, 22), salinity (23, 24), and pH (25), a variety of microbial ecological  
70 patterns with high variability in community composition have been identified in these  
71 ecosystems. Furthermore, studies are increasingly indicating that microbiologically-improved  
72 oil production processes are closely related to changes in the microbial communities of  
73 reservoirs, such as altered microbial abundance and composition (5, 26-29). This is of great  
74 significance to the study of the microbial communities inhabiting petroleum reservoirs.

75 Petroleum reservoir ecosystems are subject to extreme anthropogenic perturbations during  
76 oil exploration and oil production processes, such as drilling, workover, and the application  
77 of secondary and tertiary oil recovery techniques, all of which introduce new electron  
78 acceptors, donors, and exogenous microbes into reservoir environments. Recently, Vigneron

79 et al. (2017) elucidated the succession of microbial communities that occur over the  
80 production lifetime of an offshore petroleum reservoir (19). Their results expanded our  
81 current knowledge regarding the shifts of reservoir microbial communities in different stages  
82 of oil exploitation. However, little is known about the microbial communities in oilfield  
83 production facilities. Research in this field has profound consequences on our understanding  
84 of the microbial community distribution in reservoirs and the factors driving changes, and  
85 will improve our ability to predict and regulate reservoir microbial communities to  
86 microbiologically improve oil production processes.

87 Petroleum and formation water are usually pushed to the surface by pressure naturally  
88 found within a reservoir, known as primary recovery. Subsequently, water injection is an  
89 efficient and inexpensive secondary recovery process that is widely used to maintain  
90 reservoir pressure and achieve a higher oil-production level. The injected water generally  
91 consists of recycled water produced from oil-production wells and make-up water consisting  
92 of seawater, river water, or underground water, which contains large amounts of inorganic  
93 ions (e.g. nitrate and sulfate), dissolved oxygen, and a mass of exogenous microorganisms  
94 (17, 19, 22, 30). The water-flooding process results in the continual inoculation of reservoirs  
95 with exogenous microorganisms, nutrients, and oxygen, which will likely alter reservoir  
96 geochemistry either temporarily or permanently, and significantly influence the subsurface  
97 microbial community.

98 In water-flooding oil reservoirs, the injected water from water injection stations flows into  
99 water-injection wells, then into oil-bearing strata, and outflows from oil-production wells  
100 with crude oil (Fig. 1). Before water flows into oil-bearing strata, the microorganisms in the  
101 injected water may be easily transferred from the water-injection station to the wellheads and  
102 downhole of the water-injection wells. It is not hard to speculate that the exogenous  
103 microorganisms in the injected water and environmental variation within habitats rather than

104 diffusion-limited microbial transfer may play a more crucial role in structuring the microbial  
105 communities in the pipelines. Once the injected water flows from the downhole of  
106 water-injection wells into the oil-bearing strata and then into the oil-production wells,  
107 environmental variation within habitats and diffusion-limited microbial transfer may lead to  
108 microbial community assembly processes. Several studies have observed considerable  
109 uniformity among the microbial communities inhabiting geographic-adjacent or -isolated  
110 oil-production wells (17, 18, 31, 32). However, whether the exogenous microorganisms are  
111 able to enter oil-bearing strata and reach oil-production wells remains a subject of debate, let  
112 alone their effects on subsurface microbial communities. Therefore, a systematic study of the  
113 microbial communities is needed to elucidate the roles of environmental variables within  
114 habitats, including the microorganisms in injected water and diffusion-limited microbial  
115 transfer, in the structuring of the microbial communities in petroleum reservoirs.

116 In the present work, we investigated the compositions and metabolic profiles of the  
117 bacterial and archaeal communities in water injection stations, wellheads, and downhole of  
118 water-injection wells and oil-production wells of a water-flooding petroleum reservoir using  
119 16S rRNA gene sequencing, and analyzed the vital influences of environmental variation,  
120 microorganisms in injected water, and diffusion-limited microbial transfer in structuring the  
121 microbial communities.

## 122 **RESULTS**

### 123 **Microbial community compositions through the oilfield production facilities**

124 After filtering low quality reads and chimeras, a total of 38,102 and 39,729 of bacterial and  
125 archaeal sequences on average were obtained for each sample, respectively. The average  
126 OTU numbers of the bacterial and archaeal communities were 470 and 67, respectively. The  
127  $\alpha$ -diversity indices of the bacterial and archaeal communities in the soil samples were the

128 highest than those in the petroleum reservoir and the water-injection facilities (Fig. 2a and  
129 Fig. S1). While similar  $\alpha$ -diversity values of the bacterial and archaeal communities was  
130 detected between the water-injection stations and the wellheads of the water-injection wells,  
131 the samples in the downhole of the water-injection wells showed higher Sobs (546 vs 791,  $p$   
132  $< 0.01$ ) and Shannon (3.89 vs. 4.09,  $p < 0.01$ ) indices for the bacterial communities, and  
133 lower values for the archaeal communities (66 vs 72,  $p < 0.01$ ; 1.92 vs. 2.10). A sharp  
134 decrease in the Sobs and Shannon indices were observed for both the bacterial (245,  $p <$   
135  $0.001$ ; 1.95,  $p < 0.001$ ) and archaeal communities (53,  $p < 0.05$ ; 1.61,  $p < 0.001$ ) in the  
136 oil-production wells. The Simpson indices were higher in the oil-production wells than in the  
137 wellheads and downhole of water-injection wells for both the bacterial (0.33 vs 0.05,  $p < 0.01$ ;  
138 0.33 vs. 0.11,  $p < 0.05$ ) and archaeal communities (0.32 vs. 0.21,  $p < 0.001$ ; 0.32 vs 0.25).  
139 Detailed  $\alpha$ -diversity indices for the bacterial and archaeal communities are provided in Tables  
140 S2 and S3.

141 The bacterial communities in the water-injection stations, wellheads, and downhole of the  
142 water-injection and oil-production wells showed a similar community composition as shown  
143 in the heatmap (Fig. 3a) and cumulative histogram (Fig. S2a). The distributions of the  
144 bacterial communities were further visualized via PCoA based on weighted-Unifrac distance  
145 matrices (Fig. 2b). The ordination graph suggested that the samples from the water-injection  
146 stations and wellheads of the water-injection wells were clustered together, indicating that  
147 these locations shared similar community compositions, as confirmed by permutational  
148 multivariate analysis of variance (ADONIS;  $r^2 = 0.083$ ,  $p = 0.221$ ) and similarity analysis  
149 (ANOSIM;  $r = 0.115$ ,  $p = 0.223$ ). The microbial communities were dominated by OTUs  
150 representing Betaproteobacteria (Comamonadaceae, Alcaligenaceae, and Rhodocyclaceae)  
151 and Alphaproteobacteria (Rhodobacteraceae, Sphingomonadaceae, and Burkholderiaceae),  
152 followed by Flavobacteria (*Flavobacterium*) and Gamaproteobacteria (*Pseudomonas*) (Fig.

153 3b and Fig. S3). The samples collected from the wellheads and downhole of the  
154 water-injection wells formed distinct clusters in the PCoA plot (Fig. 2b), and the microbial  
155 communities in these locations were statistically significant (ADONIS,  $r^2 = 0.472$ ,  $p = 0.001$ ;  
156 ANOSIM,  $r = 0.855$ ,  $p = 0.001$ ). In contrast to the bacterial communities from the wellheads  
157 of the water-injection wells, the relative abundances of Clostridia (Clostridiaceae),  
158 Deltaproteobacteria (Syntrophaceae, Syntrophorhabdaceae, Desulfobulbaceae, and  
159 Desulfovibrionaceae), Anaerolineae (Anaerolineaceae), and Synergistia were significantly  
160 higher in the bacterial communities from the downhole of the water-injection wells, where  
161 Betaproteobacteria, Alphaproteobacteria, and Flavobacteria were found to diminish markedly  
162 (Fig. 3b and Fig. S4). The composition of the bacterial community changed significantly  
163 again in the oil-production wells (ADONIS,  $r^2 = 0.333$ ,  $p = 0.001$ ; ANOSIM,  $r = 0.695$ ,  $p =$   
164 0.001). Gammaproteobacteria, Betaproteobacteria, and Epsilonproteobacteria became the  
165 most abundant lineages, and *Pseudomonas*, *Acinetobacter*, *Thauera*, and *Arcobacter* were the  
166 dominant genera (Fig. 3b and Fig. S5).

167 Most of the archaeal populations detected existed persistently throughout the water  
168 injection and oil production facilities. *Methanosaeta*, *Methanobacterium*,  
169 *Methanothermobacter*, *Methanolinea*, *Methanomethylovorans*, *Methanocalculus*, and  
170 *Methanoculleus* accounted for the majority of the archaeal sequences in each sample (Fig. 4a  
171 and Fig. S2b). However, despite this, *Methanosaeta*, *Methanobacterium*, and *Methanolinea*  
172 were the dominant genera and species in the water-injection facilities, while the  
173 oil-production wells were predominated by *Methanosaeta*, *Methanomethylovorans*, and  
174 *Methanocalculus*. In addition, significant changes in the archaeal communities were observed  
175 between the samples from the downhole of the water-injection and oil-production wells  
176 (ADONIS,  $r^2 = 0.186$ ,  $p = 0.008$ ; ANOSIM,  $r = 0.242$ ,  $p = 0.005$ ). The dominant species  
177 *Methanobacterium* and *Methanolinea* were higher in the downhole of the water-injection



178 wells than in the oil-production wells, in which *Methanomethylovorans* ( $p < 0.01$ ),  
179 *Methanocalculus* ( $p < 0.01$ ), and *Methanosaeta* were more abundant (Fig. 4b).

## 180 **Distinct metabolic profiles of the microbial communities**

181 The metabolic profiles of the bacterial and archaeal communities in the wellheads and  
182 downhole of the water-injection and oil-production wells were inferred from 16S rRNA data  
183 using Tax4Fun. For the bacterial communities, the majority of the predicted protein  
184 sequences annotated with KEGG pathways were clustered into metabolism (56.42-63.66%),  
185 environmental information processing (15.62-22.42%), genetic information processing  
186 (9.08-14.25%), and cellular processes (3.97-7.42%). Significant differences were observed in  
187 the aforementioned pathways among the wellheads and downhole of the water-injection, and  
188 oil-production wells as illustrated in Fig. 5 and Fig. S6-8a. The sequences related to the  
189 biosynthesis of other secondary metabolites were found to have the highest abundance in the  
190 wellheads of the water-injection wells (Fig. 5a) ( $p < 0.05$ ). In addition, the relative abundance  
191 of the sequences related to amino acid metabolism, xenobiotic biodegradation and  
192 metabolism, and lipid metabolism were higher than those of the downhole of the  
193 water-injection wells (Fig. 5a) ( $p < 0.05$ ), while amino acid metabolism, carbohydrate  
194 metabolism, translation, nucleotide metabolism, replication and repair, and glycan  
195 biosynthesis and metabolism had higher abundances than those of the oil-production wells  
196 (Fig. 5a) ( $p < 0.05$ ). In the downhole of the water-injection wells, the relative abundance of  
197 sequences associated with energy metabolism, translation, nucleotide metabolism, and glycan  
198 biosynthesis and metabolism were higher than those of the wellheads of the water-injection  
199 and oil-production wells (Fig. 5a) ( $p < 0.05$ ). Compared with the wellheads and downhole of  
200 the water-injection wells, the sequences associated with cell motility (bacterial chemotaxis),  
201 cellular community (biofilm formation), and signal transduction (two-component system)  
202 were more abundant in oil-production wells (Fig. 5a) ( $p < 0.05$ ). In addition, the sequences

203 related to xenobiotic biodegradation and metabolism, lipid metabolism, metabolism of  
204 terpenoids and polyketides, amino acid metabolism, and membrane transport were higher  
205 than those of the downhole water-injection wells (Fig. 5a) ( $p < 0.05$ ).

206 For the archaeal communities, the sequences clustered into metabolism, environmental  
207 information processing, genetic information processing, and cellular processes accounted for  
208 62.97-63.43%, 8.05-13.13%, 19.18-20.51%, and 1.38-2.70%, respectively. Significant  
209 differences were observed in the pathways between the water-injection and oil-production  
210 wells (Fig. 5b and Figs. S6-8b). In the wellheads and downhole of water-injection wells, the  
211 relative abundance of the sequences related to energy metabolism, translation, metabolism of  
212 cofactors and vitamins, glycan biosynthesis and metabolism, and replication and repair were  
213 higher than those of the oil-production wells (Fig. 5b) ( $p < 0.05$ ). However, the sequences  
214 associated with membrane transport (bacterial secretion system), lipid mechanism, and  
215 xenobiotic biodegradation and metabolism were found to have higher abundances in the  
216 oil-production wells (Fig. 5b) ( $p < 0.05$ ).

### 217 **Distinct network patterns of the bacterial communities**

218 Co-occurrence network analysis was used to assess the interactions of microbial populations  
219 within the microbial communities inhabiting the water-injection and oil-production wells.  
220 The complexities of the networks were compared based on the number of nodes, edges,  
221 average degrees, clustering coefficient, scale-free, and modularity (Fig. 6). The phylogenetic  
222 molecular ecological networks were constructed with similarity thresholds of 0.81, 0.98, and  
223 0.81 for the wellheads and downhole of the water-injection and oil-production wells,  
224 respectively. However, a greater number of nodes and links were observed in the downhole  
225 network of the water-injection wells, followed by the wellheads of the water-injection wells,  
226 followed by the oil-production wells. Compared with the wellhead network ( $R^2 = 0.463$ ) and

227 the network of the oil-production wells ( $R^2 = 0.197$ ), the downhole network was closely fitted  
228 with the power-law model ( $R^2 = 0.863$ ), representing a scale-free network, in which few  
229 nodes in the network have a large number of neighbors and most nodes have few neighbors.  
230 There was a higher average degree and average clustering coefficient and a lower  
231 centralization of degree and betweenness of the nodes in the wellhead network. The  
232 modularity and number of modules were higher in the downhole and oil-production well  
233 networks than in the wellhead network. In addition, there were more positive correlations in  
234 the networks of the wellheads and downhole of the water-injection wells, while more  
235 negative correlations were observed in the oil-production wells.

236 The potential keystone taxa in each network were screened (Table S4), including those that  
237 act as connectors, module hubs, network hubs, and those with low betweenness and/or high  
238 degree (33-36). More nodes were assigned to Betaproteobacteria, Alphaproteobacteria,  
239 Flavobacteriia, and Sphingobacteriia in the wellhead network. The bacterial keystone taxa  
240 were mainly from Flavobacteriaceae, Commamonadaceae, Lentimicrobiaceae, Syntrophaceae,  
241 Pseudomonadaceae, Sphingomonadaceae, Rhodobacteraceae, and Alcaligenaceae, including  
242 the dominant genera *Flavobacterium*, *Novosphingobium*, *Gemmobacter*, *Roseovarius*,  
243 *Smithella*, and *Pseudomonas*. There were more nodes from Clostridia, Deltaproteobacteria,  
244 Anaerolineae, Nitrospira, Betaproteobacteria, and Synergistia in the downhole network. The  
245 keystone taxa mainly belonged to Clostridiaceae, Anaerolineaceae, Syntrophaceae,  
246 Rhodocyclaceae, Desulfovibrionaceae, and Desulfobulbaceae, including the dominant genera  
247 *Clostridium*, *Nitrospira*, *Syntrophus*, *Smithella*, *Desulfovibrio*, and *Desulfobulbus*. In the  
248 network of the oil-production wells, the nodes were mainly from Gammaproteobacteria,  
249 Betaproteobacteria, Epsilonproteobacteria, and Deltaproteobacteria, and the OTUs that were  
250 assigned to Rhodocyclaceae and Syntrophaceae were the main keystone taxa, including  
251 dominant genera *Thauera*, *Azoarcus*, *Dechloromonas*, and *Smithella*. This is also reflected in

252 the differences observed in the overall community compositions among oilfield production  
253 facilities.

#### 254 **Environmental selection on the microbial communities**

255 To observe changes in the environmental variables of water-injection facilities and  
256 oil-production wells, NMDS and ADONIS analyses were performed using the contents of  
257 acetate,  $\text{NO}_3^-$ ,  $\text{SO}_4^{2-}$ , total nitrogen, and total phosphorus. As shown in the NMDS plot, the  
258 samples collected from similar locations were clustered together (Fig. S9). No significant  
259 differences in the environmental factors were observed between the water-injection stations  
260 and the wellheads of the water-injection wells. However, significant differences were  
261 observed among the wellheads and downhole of the water-injection and oil-production wells  
262 (Table S5). The wellheads of the water-injection wells had a higher  $\text{NO}_3^-$  concentration (8.33  
263 mg/L), which was found to decrease significantly in the downhole of the water-injection  
264 wells (2.66 mg/L, ADONIS,  $R^2 = 0.41$ ,  $p \leq 0.01$ ) and the oil-production wells (0.90 mg/L,  
265 ADONIS,  $R^2 = 0.41$ ,  $p \leq 0.01$ ). The concentration of  $\text{SO}_4^{2-}$  (32.10 mg/L) in the downhole  
266 of the water-injection wells was over 2.5-fold that in the wellheads of the water-injection  
267 wells (12.01 mg/L) and 6-fold that in the oil-production wells (5.18 mg/L). The concentration  
268 of phosphorus (29.64 mg/L) in the downhole of the water-injection wells was over 10-fold  
269 that in the wellheads of the water-injection wells (2.83 mg/L) and the oil-production wells  
270 (2.88 mg/L). There were no significant changes in the acetate concentrations, which averaged  
271 11.24–11.69–mg/L in the water-injection and oil-production wells (Table S5).

272 The effects of environmental variations on the spatial distributions of the bacterial and  
273 archeal communities were further analyzed via the Mantel test, ADONIS, and CCA analysis.  
274 The Mantel test showed significant correlations between the environmental variables and  
275 microbial community compositions through the water-injection facilities and oil-production

276 wells (Table S6). Significant correlations were observed between the bacterial communities  
277 and the contents of acetate and  $\text{NO}_3^-$  (Table S6; Mantel,  $p = 0.011$  and  $0.007$ , respectively),  
278 and between the archaeal communities and  $\text{NO}_3^-$  content (Table S6; Mantel,  $p = 0.008$ ) in the  
279 water-injection pipelines consisting of combined stations, water-injection stations, and the  
280 wellheads of water-injection wells. For the wellheads and downhole of the water-injection  
281 and oil-production wells, significant correlations were observed between the bacterial  
282 communities and the total phosphorus,  $\text{NO}_3^-$ , and  $\text{SO}_4^{2-}$  contents (Table S6; Mantel,  $p =$   
283  $0.001$ ), and between the archaeal communities and the total nitrogen content (Table S6;  
284 Mantel,  $p = 0.045$ ). ADONIS showed that total phosphorus and  $\text{SO}_4^{2-}$  can effectively explain  
285 the changes in the compositions of the bacterial community in the wellheads and downhole of  
286 the water-injection wells, and in the downhole of the water-injection and oil-production wells  
287 (Table S7). For the archaeal communities, significant correlations between community  
288 composition and total phosphorus and  $\text{SO}_4^{2-}$  were observed for the downhole of the  
289 water-injection and oil-production wells (Table S6). Despite the high correlation, CCA  
290 analysis indicated that the environmental variables could only explain 14.8% of the bacterial  
291 community changes, and 24.8% of the archaeal community changed through the  
292 injection-production facilities (Fig. 2c and Table S8).

### 293 **Diffusion-limited microbial transfer in the water-injection pipelines and oil-bearing** 294 **strata**

295 The persistent OTUs were analyzed to elucidate a potential transfer of microorganisms in the  
296 water-injection pipelines and oil-production wells. As shown in Venn diagrams, a large  
297 number of persistent OTUs were detected through the water-injection facilities and  
298 oil-production wells (Fig. S10). Correlation analysis indicated that the water-injection  
299 stations and the wellheads of the water-injection wells harbored a large number of shared  
300 OTUs with similar relative abundances (Fig. 7a; Pearson correlation coefficient ( $r$ ) =  $0.78$ ,  $p$

301 < 0.001 for bacteria and  $r = 0.97$ ,  $p < 0.001$  for archaea). A large number of shared OTUs  
302 with different relative abundances were detected in the wellheads and downhole of  
303 water-injection wells (Fig. 7a,  $r = 0.78$ ,  $p < 0.001$  for bacteria and  $r = 0.97$ ,  $p < 0.001$  for  
304 archaea). There were also substantial OTUs with different relative abundances in the  
305 downhole of the water-injection and oil-production wells (Fig. 7a,  $r = 0.78$ ,  $p < 0.001$  for  
306 bacteria and  $r = 0.97$ ,  $p < 0.001$  for archaea). As shown in Fig. 7b, 51.1-74.9% of the OTUs  
307 detected in the downhole of the water-injection wells were detected in the wellheads of the  
308 water-injection wells, and 8.2-43.9% of the OTUs from the oil-production wells appeared in  
309 the downhole of the water-injection wells. In addition, the proportions of the shared OTUs in  
310 the oil-production wells showed strong correlations with the formation permeability of the  
311 oil-production wells. In fact, in blocks d, f, and i, the correlation coefficient reached 0.961  
312 (Fig. 7b;  $p < 0.01$ ). The correlation of the shared OTUs with the formation permeability of  
313 the oil-production wells was not clear in blocks e and l (Fig. 7b).

314 Moreover, diffusion-limited microbial transfer in oil-bearing porous medium was tested in  
315 oil-bearing cores using strain SG-rfp marked by a red fluorescent protein-encoding gene (37).  
316 For the cores with a permeability of  $1.405 \mu\text{m}^2$ , a bright fluorescent signal was observed in  
317 the effluent when 1 pore volume (PV) of the displacing fluid containing RFP-labeled  
318 *Pseudomonas aeruginosa* was injected. The maximum fluorescence was observed when 2 PV  
319 displacing fluid was injected (Fig. S11). For the cores with a permeability of  $0.203 \mu\text{m}^2$ , a  
320 fluorescent signal was clearly observed in the effluent when 2 PV of displacing fluid was  
321 injected. The maximum fluorescence was observed until 15 PV displacing fluid was injected  
322 (Fig. S11). These results indicate that microorganisms in injected water can migrate through  
323 oil-bearing porous medium with the water flow, and that the formation permeability imposed  
324 significant limitations on microbial migration.

## 325 DISCUSSION

326 Microbial-enhanced oil recovery in production is well known for the involvement of  
327 microorganisms and their metabolites under a wide spectrum of oil reservoir types (5, 8, 9).  
328 To substantiate the process of microbiologically improving oil production is more effective, a  
329 clear understanding of the distribution of microbial communities in oilfield production  
330 facilities is necessary. As a result, this study systematically investigated the composition and  
331 metabolic characteristics of microbial communities in water-injection pipelines and  
332 oil-production wells of a water-flooding petroleum reservoir, and revealed the roles of  
333 environmental variation, microorganisms in injected water, and diffusion-limited microbial  
334 transfer in determining the structure of the microbial communities.

335 The compositions of the microbial community in oilfield production facilities show spatial  
336 specificity. Microbial community  $\alpha$ -diversity reflects the number of species in a local  
337 homogeneous habitat. In the oilfield production facilities, we found that the  $\alpha$ -diversity of  
338 both the bacterial and archaeal communities was significantly lower than that found in the  
339 ground surface soil. The downhole of the water-injection wells had a higher community  
340  $\alpha$ -diversity, while a lower community  $\alpha$ -diversity was observed in the oil-production wells. In  
341 petroleum reservoirs, both the bacterial and archeal community  $\alpha$ -diversity is influenced by  
342 extreme environmental conditions and oil-production processes, such as high temperature,  
343 hypersalinity, and oil recovery methods (25). This phenomenon may be explained by the  
344 adaptability and metabolic types of the microorganisms (see analysis of metabolic profiles).  
345 The water-injection stations and the wellheads of the water-injection wells were found to  
346 contain similar bacterial communities, dominated by Betaproteobacteria (Comamonadaceae,  
347 Alcaligenaceae, and Rhodocyclaceae), Alphaproteobacteria (Rhodobacteraceae,  
348 Sphingomonadaceae, and Burkholderiaceae), Flavobacteria (Flavobacteriaceae), including  
349 dominant genera *Tepidimonas*, *Extensimonas*, *Hydrogenophaga*, *Flavobacterium*, *Thauera*,  
350 *Smithella*, *Novosphingobium*, *Gemmobacter*, *Roseovarius*, *Azoarcus*, *Azovibrio*, and

351 *Rhodobacter*. Most of these populations were comprised of aerobic or facultative anaerobic.  
352 The species of the genus *Tepidimonas* (Comamonadaceae) are generally strictly aerobic and  
353 chemolithoheterotrophic (38). *Hydrogenophaga* (Comamonadaceae) species are  
354 hydrogen-oxidizing bacteria that are able to ferment organic acids (39). *Thauera*  
355 (Rhodocyclaceae) has been described as isopropanol, acetone, and aromatic hydrocarbons,  
356 and is the main contributor to the mitigation of biological souring in oil reservoirs (12, 40).  
357 Some species from *Smithella* have been described as anaerobic propionate-degrading  
358 syntrophs (41). Some species of *Azoarcus* (Rhodocyclaceae) are able to fix nitrogen (42).  
359 *Rhodobacter* species (Rhodobacteraceae) show a wide range of metabolic capabilities,  
360 including photosynthesis, lithotrophy, aerobic and anaerobic respiration, nitrogen fixation,  
361 and the synthesis of tetrapyrroles, chlorophylls, heme, and vitamin B12 (43). The downhole  
362 of the water injection wells was dominated by Clostridia (Clostridiaceae),  
363 Deltaproteobacteria (Syntrophaceae, Syntrophorhabdaceae, Desulfobulbaceae, and  
364 Desulfovibrionaceae), Anaerolineae (Anaerolineaceae), Synergistia, and Nitrospira, including  
365 dominant genera *Clostridium*, *Syntrophus*, *Smithella*, *Desulfovibrio*, *Desulfobulbus*,  
366 *Longilinea*, *Aminiphilus*, *Thermovirga*, and *Nitrospira*. *Clostridium* is a genus of a group of  
367 strictly anaerobic Gram-positive bacteria, and has been widely used for the production of  
368 organic acids, organic solvents, and enzymes, such as acetone, butanol, 1,3-propanediol,  
369 ethanol, butanol, acetic acid, and biohydrogen (44). *Syntrophus* species were reported to be  
370 able to degrade benzoate into acetate and H<sub>2</sub>, which were subsequently converted to methane  
371 by *Methanosarcina* and *Methanoculleus*, and the direct interspecies electron transfer of  
372 *Desulfovibrio* and *Methanosarcina* (45). *Desulfovibrio* and *Desulfobulbus* are commonly  
373 detected sulfate-reducers that reduce sulfates to hydrogen sulfide in petroleum reservoirs (46).  
374 Anaerobic amino-acid-degrading *Thermovirga* has been previously isolated from a North Sea  
375 oil well (47). The oil-production wells were dominated by Gammaproteobacteria



376 (Pseudomonadaceae), Betaproteobacteria (Rhodocyclaceae, Hydrogenophilaceae),  
377 Epsilonproteobacteria (Campylobacteraceae), and Deltaproteobacteria (Geobacteraceae),  
378 including facultative anaerobic dominant genera *Pseudomonas*, *Thauera*, *Hydrogenophaga*,  
379 *Acinetobacter*, *Atribacteria*, *Arcobacter*, *Acetobacterium*, and *Geobacter*. Many strains of  
380 *Pseudomonas* and *Acinetobacter* are capable of utilizing hydrocarbons and producing  
381 biosurfactants (6, 48, 49). *Geobacter* plays an important role in electron exchange by direct  
382 interspecies electron transfer (1). Most of the detected archaeal populations persistently  
383 existed throughout the oilfield production facilities. It is worth noting that *Methanosaeta*,  
384 *Methanobacterium*, and *Methanolinea* predominated in the water-injection facilities, while  
385 the oil-production wells were dominated by *Methanosaeta*, *Methanomethylovorans*, and  
386 *Methanocalculus*. *Methanosaeta* is an acetoclastic methanogen that uses only acetate in  
387 methane production, while *Methanobacterium*, *Methanolinea*, and *Methanocalculus* are  
388 methylotrophic and hydrogenotrophic methanogens (50). *Methanomethylovorans* is a  
389 methylotrophic methanogen that is able to grow on dimethyl sulfide and methanethiol (51). It  
390 is not difficult to see that microorganisms inhabiting petroleum reservoirs maintain a close  
391 association with each other and show a high metabolic potential for hydrocarbon degradation,  
392 sulfate reduction, nitrate/nitrite reduction, and methanogenesis.

393 Associating community compositions with functional predictions enabled us to decipher the  
394 potential ecological traits of the microbial communities found throughout oilfield production  
395 facilities. Significant differences in metabolism, environmental information processing,  
396 genetic information processing, and cellular processes pathway were observed among the  
397 wellheads and downhole of the water-injection and oil-production wells. Pathways associated  
398 with the biosynthesis of other secondary metabolites, amino acid metabolism, xenobiotic  
399 biodegradation and metabolism, and lipid metabolism likely played more important roles in  
400 the wellheads of the water-injection wells. By contrast, the downhole of the water-injection

401 wells showed more activity in pathways associated with energy metabolism, translation,  
402 nucleotide metabolism, and glycan biosynthesis and metabolism. These findings suggest that  
403 the growth and metabolism of microorganisms in the downhole of the water-injection wells  
404 were more active. In the oil-production wells, cell motility (bacterial chemotaxis), cellular  
405 community (biofilm formation), and signal transduction (two-component system) were found  
406 to be more active. In addition, xenobiotic biodegradation and metabolism, metabolism of  
407 terpenoids and polyketides, amino acid metabolism, and membrane transport also played  
408 important roles. Bacteria usually use chemotaxis to position themselves within the optimal  
409 portion of their habitats to approach specific chemical attractants and avoid repellent ligands  
410 (52). Both bacteria and archaea are capable of forming biofilms, which often benefit the  
411 survival of microorganisms in the presence of environmental stresses, such as low or high pH  
412 and toxic chemicals, and facilitate horizontal gene transfer and syntrophy with other  
413 microorganisms (53). Due to the extreme environment in oil reservoirs, microbial populations  
414 most likely tend to metabolize substrates in the form of synergetic metabolism and mutualism.  
415 The abundance of two-component systems suggests that the microorganisms in the  
416 oil-production wells are likely to have suffered more extreme environmental stresses,  
417 particularly nutritional deficiency and oxygen limitation. The two-component systems also  
418 regulate a variety of physiological behaviors of microorganisms, such as motility, chemotaxis  
419 (54), spore formation (55), and biofilm formation (56).

420 The microbial community composition throughout oil-production facilities was closely  
421 correlated with to the nutrients available. Mantel test, ADONIS, and CCA analysis revealed  
422 significant correlations between the total phosphorus,  $\text{NO}_3^-$ , and  $\text{SO}_4^{2-}$  contents and the  
423 compositions of the microbial communities throughout the oilfield production facilities. It is  
424 worth noting that the phosphorus and  $\text{SO}_4^{2-}$  contents in the downhole of the water-injection  
425 wells were far greater than those in the wellheads of the water-injection and oil-production

426 wells. This is consistent with higher activity in the growth and metabolism of microorganisms  
427 in the downhole of the water-injection wells. With the increase in the  $\text{SO}_4^{2-}$  content, the  
428 abundance of sulfate-reducers, such as *Desulfovibrio* and *Desulforhabdus*, also significantly  
429 increased. The accumulation of sulfate and other nutrients (especially phosphate) in the  
430 downhole of the water-injection wells may be interpreted as chemical deposition under the  
431 action of formation brines and the interception role because of the sieve effect of oil-bearing  
432 strata. Despite demonstrating a high correlation, the nutrient distribution only partially  
433 explained the changes in the bacterial and archeal communities throughout the  
434 injection-production facilities. Oxygen levels, temperature (13, 22, 57), salinity (23, 24, 58),  
435 and pH (25, 59) are other major determinants of microbial community composition. As the  
436 results of the ANOSIM and ADONIS analyses reveal, strong relationships were observed  
437 between sampling sites and microbial community compositions. Combined with the  
438 distribution of dominant microbial populations throughout the injection-production facilities,  
439 oxygen levels are likely to play a crucial role in determining community composition.

440 The water-flooding process seems to continually inoculate reservoirs with exogenous  
441 microorganisms. However, whether the microorganisms in injected water can pass through  
442 oil-bearing strata and reach oil-production wells, and the influence of these microorganisms  
443 on subsurface microbial communities, remains unclear. The low permeability of oil-bearing  
444 strata inevitably exerts a significant influence on microbial diffusion in oil reservoirs. Lenchi  
445 et al. reported that the bacteria associated with water injected into oil reservoirs were not  
446 retrieved from oil-production waters (60). Further research has found that a large number of  
447 shared OTUs were detected in water-injection wells and adjacent oil-production wells, with  
448 aerobic populations often appearing in oil-production wells (17, 18, 31, 32). It seems that  
449 microorganisms on the ground may migrate or be brought into oil reservoirs during the oil  
450 production process. Ren et al. recently suggested that the transportation of injected bacteria in

451 oil-bearing strata was impacted by the varied permeability from water-injection wells to  
452 adjacent oil-production wells (30). In the present study, a large number of OTUs with similar  
453 relative abundances were observed simultaneously in the water-injection stations and the  
454 wellheads of the water-injection wells, and greater ratios of shared OTUs were observed  
455 between the wellheads and downhole of the water-injection wells than those between the  
456 downhole of the water-injection wells and the oil-production wells. These findings imply that  
457 microorganisms may migrate in water flowing in water-injection pipelines and oil-bearing  
458 strata. Furthermore, the ratios of shared OTUs detected in the downhole of the  
459 water-injection and oil-production wells showed strong correlations with the corresponding  
460 formation permeability, highlighting the influence of geographic isolation on microbial  
461 transfer in oil-bearing strata. This phenomenon was further demonstrated using the  
462 core-flooding test. Although microorganisms can be brought into oil-bearing strata even in  
463 oil-production wells, their influence on the subsurface microbial communities is closely  
464 related to their adaption and growth in new environments.

465 In this study, we revealed the spatial distribution of microbial communities in the  
466 oil-production facilities of a water-flooding petroleum reservoir. Our results indicate that  
467 environmental variation and microorganisms in injected water are the determinants of the  
468 structure of microbial communities in water-injection facilities, while the determinants in  
469 oil-bearing strata are environmental variation and diffusion-limited microbial transfer. These  
470 findings provide further insights into the distribution of microbial communities in  
471 oil-production facilities and could have profound consequences on the use of reservoir  
472 microorganisms for improving the oil production process. However, future studies will need  
473 to quantify the effects of these factors on structuring the microbial communities in  
474 oil-production facilities.

## 475 **MATERIALS AND METHODS**

## 476 **Sampling sites and samples collection**

477 A water-flooding petroleum reservoir of the Daqing Oilfield in the northeast China was  
478 chosen for this study. The temperature of the reservoir was approximately 45°C. Samples  
479 were collected from combined stations a, g, and j, corresponding to oil-water separation and  
480 water treatment before water re-injection into the well, water-injection stations b, c, h, and k,  
481 for transferring water to wellheads and downhole of water injection wells, and oil-production  
482 wells of blocks d, e, f, i, and l (Fig. 1). The water of water-injection stations b and c was from  
483 combined station a. The injected water flowed from b into the water-injection wells of blocks  
484 d and e, and flowed from c into the water-injection wells of block f. The injected water at  
485 injection station h was from combined station g and flowed into the water-injection wells of  
486 block i. The injected water of injection station k was from combined station j and flowed into  
487 the water-injection wells of block l. The average permeability of block d is  $0.3 \mu\text{m}^2$ , ranging  
488 from  $0.197 \mu\text{m}^2$  to  $0.5 \mu\text{m}^2$ . The average permeability of block f is  $0.289 \mu\text{m}^2$ , ranging from  
489  $0.125 \mu\text{m}^2$  to  $0.811 \mu\text{m}^2$ . The average permeability of block e is  $0.069 \mu\text{m}^2$ , ranging from  
490  $0.07 \mu\text{m}^2$  to  $0.128 \mu\text{m}^2$ . The average permeability of block i is  $0.099 \mu\text{m}^2$ , ranging from  $0.071$   
491  $\mu\text{m}^2$  to  $0.121 \mu\text{m}^2$ . The average permeability of the block l is  $0.204 \mu\text{m}^2$ , ranging from  $0.028$   
492  $\mu\text{m}^2$  to  $0.245 \mu\text{m}^2$ .

493 The samples from the downhole of the water-injection wells were obtained by water  
494 backflow; that is, injected water flowed upward through the well-hole under pressure. The  
495 other samples were taken through the reserved sampling valves of the water-injection and  
496 oil-production facilities. The samples collected filled 10-L sterilized plastic buckets, which  
497 were tightly sealed with screw caps, and immediately transported to the laboratory for DNA  
498 extraction and chemical analysis. The samples were numbered with the sampling sites, such  
499 as d1 and d2, which represent the samples collected from the wellheads and downhole of the  
500 water-injection well d1 in block d. In addition, three soil samples labeled as T1, T2, and T3

501 were collected from the ground soil (at a depth of 5 cm) of the water injection wells d1, d3,  
502 and d5, respectively.

### 503 **Chemical analysis and DNA extraction**

504 The concentrations of acetate,  $\text{NO}_3^-$ , and  $\text{SO}_4^{2-}$  in the water samples were determined using an  
505 ion chromatograph (DIONEX ICS-1000) equipped with a Shim-pack IC-C3 column. Total  
506 nitrogen and phosphorus were analyzed according to “HJ 636-2012 Water quality -  
507 Determination of total nitrogen - Alkaline potassium persulfate digestion UV  
508 spectrophotometric method” and “GB 11893-1989 Water quality - Determination of total  
509 phosphorus - Ammonium molybdate spectrophotometric method”, respectively. Detailed data  
510 are listed in [Table S1](#). Microbial cells were collected from to 2-3 L of water samples by  
511 centrifugation at  $12,000 \times g$  and  $4^\circ\text{C}$  for 20 min in a high-speed centrifuge (Beckman, USA).  
512 Total genomic DNA was extracted using AxyPrep<sup>TM</sup> Genomic DNA Miniprep Kit (Axygen,  
513 USA) combined with bead shaker treatment, as previously described ([5](#)).

### 514 **16S rRNA sequencing and bioinformatics analysis**

515 The bacterial and archaeal 16S rRNA genes were amplified using the universal prokaryotic  
516 primers 515f (5'-GTG CCA GCM GCC GCG GTA A-3'), 907r (5'-CCG TCA ATT CMT  
517 TTR AGT TT-3'), 524f (5'-TGY CAG CCG CCG CGG TAA-3'), and 958r (5'-YCC GGC  
518 GTT GAV TCC AAT T-3'), respectively. PCR amplicons were paired-end sequenced ( $2 \times 250$   
519 bp) on an Illumina MiSeq platform, according to the standard protocol (Majorbio Bio-Pharm  
520 Technology Co., Ltd, Shanghai, China). Raw fastq files were demultiplexed and  
521 quality-filtered using QIIME2 ([61](#)). The sequences were assigned to operational taxonomic  
522 units (OTUs) at a 97% sequence similarity level using the UPARSE pipeline ([62](#)). The  
523 representative sequence sets were aligned and given a taxonomic classification by RDP ([63](#))  
524 against the SILVA Small Subunit rRNA database at an 80% confidence threshold. The

525  $\alpha$ -diversity, including observed OTUs, Chao1, Shannon, and Simpson indices, was calculated  
526 based on the OTUs. The community  $\beta$ -diversity was estimated based on weighted-UniFrac  
527 dissimilarity between samples.

528 Tax4Fun (64) was used to predict the functional profiles of the microbial communities based  
529 on the 16S rRNA data obtained on Majorbio Cloud Platform ([www.majorbio.com](http://www.majorbio.com)). Tax4Fun  
530 transforms the SILVA-based OTU classification into a taxonomic profile of identical or  
531 closely-related genomes in the Kyoto Encyclopedia of Genes and Genomes (KEGG) database.  
532 These taxonomic profiles were converted into artificial metagenomes/metatranscriptomes by  
533 incorporating the functional data calculated from the genomes of each KEGG organism. The  
534 statistical significance of differentially abundant functional categories was tested using  
535 Statistical Analysis of Metagenomic Profiles (STAMP) software (65). To explore potential  
536 interactions among the microbial populations, co-occurrence network analyses were carried  
537 out based on the Pearson correlation between OTUs using Molecular Ecological Network  
538 Analyses Pipeline (MENAP) (33). Poorly represented OTUs (i.e. those existing in fewer than  
539 50% of the samples and had less than 0.05% average relative abundance in each group) were  
540 removed from the network analyses. To describe the topology of the resulting network,  
541 average node connectivity, average path length, diameter, cumulative degree distribution,  
542 clustering coefficient, and modularity were calculated. The constructed networks were  
543 visualized using Cytoscape version 3.7.2 (66).

#### 544 **Statistical analysis**

545 Changes in the community  $\alpha$ -diversity of the water-injection and oil-production facilities  
546 were analyzed using analysis of variance (ANOVA). To visualize the relationships of the  
547 microbial communities, principal coordinates analysis (PCoA) was performed based on  
548 weighted-UniFrac dissimilarity matrices. To determine the significant differences in the

549 microbial  $\beta$ -diversity of the water-injection and oil-production facilities, permutational  
550 multivariate analysis of variance (ADONIS) and similarity analysis (ANOSIM), depending  
551 on the weighted-UniFrac distance matrices, were carried out using the “adonis” and “anosim”  
552 function of the “vegan” package in R. Wilcoxon rank-sum test was used to identify the  
553 microbial populations with statistically differential abundances among the wellheads and  
554 downhole of the water-injection and oil-production wells. Correlations between the relative  
555 abundance of bacterial or archaeal OTUs and the shared OTU proportions with permeability  
556 of oil-bearing strata were analyzed using the “ggplot2” package in R. Mantel test and  
557 ADONIS analysis were used to detect correlations between environmental variables and  
558 microbial community compositions using the “vegan” package in R. Based on the long length  
559 of the first axis of detrended correspondence analysis (DCA), the unimodal ordination  
560 method, canonical correspondence analysis (CCA) was performed to elucidate the  
561 relationship between environmental factors and OTU-level microbial communities using the  
562 “vegan” package in R.

### 563 **Sequences accessibility**

564 The raw reads obtained by Illumina MiSeq sequencing were deposited in the Sequence Read  
565 Archive (SRA) at the National Center for Biotechnology Information  
566 (<https://www.ncbi.nlm.nih.gov/bioproject/PRJNA489604>).

### 567 **ACKNOWLEDGMENTS**

568 This work was funded by the National Natural Science Foundation of China (Grant No.  
569 31500414 and 41773080), Shandong Provincial Agricultural Fine Species Project  
570 (2019LZGC020), National Key Research and Development Project (Grant No.  
571 2018YFA0902101), Jining key research and development project (Grant No.  
572 2019ZDGH019), and National High Technology Research and Development Program of



573 China (Grant No. 2013AA064402). We thank Prof. Ying Zhang, Institute of Applied Ecology,  
574 Chinese Academy of Sciences, Shenyang, China, and Dr. Jianlong Xiu, Research Institute of  
575 Petroleum Exploration and Development (Langfang), Langfang, China, who provided  
576 technical support in core-flooding test. We also thank Fang Liu and Xiaobo Liu, No. 2 Oil  
577 Production Plant, PetroChina Daqing Oilfield Limited Company, Daqing, China, for their  
578 assistance in sample processing.

579 **Conflict of Interest**

580 The authors declare no competing financial interest.

581

## 582 REFERENCES

- 583 1. Pannekens M, Kroll L, Müller H, Mbow FT, Meckenstock RU. 2019. Oil reservoirs, an exceptional  
584 habitat for microorganisms. *New Biotechnology* 49:1-9.
- 585 2. Voordouw G. 2011. Production-related petroleum microbiology: progress and prospects. *Curr Opin*  
586 *Biotechnol* 22:401-405.
- 587 3. Varjani SJ, Gnansounou E. 2017. Microbial dynamics in petroleum oilfields and their relationship with  
588 physiological properties of petroleum oil reservoirs. *Bioresource Technology* 245:1258-1265.
- 589 4. Youssef N, Elshahed MS, McNerney MJ. 2009. Microbial processes in oil fields: culprits, problems, and  
590 opportunities. *Adv Appl Microbiol* 66:141–251.
- 591 5. Li GQ, Gao PK, Wu YQ, Tian HM, Dai XC, Wang YS, Cui QS, Zhang HZ, Pan XX, Dong HP, Ma T. 2014.  
592 Microbial Abundance and Community Composition Influence Production Performance in a  
593 Low-Temperature Petroleum Reservoir. *Environ Sci Technol* 48:5336-5344.
- 594 6. Zhao F, Li P, Guo C, Shi R-J, Zhang Y. 2018. Bioaugmentation of oil reservoir indigenous *Pseudomonas*  
595 *aeruginosa* to enhance oil recovery through in-situ biosurfactant production without air injection.  
596 *Bioresource Technology* 251:295-302.
- 597 7. Song W-F, Wang J-W, Yan Y-C, An L-Y, Zhang F, Wang L, Xu Y, Tian M-Z, Nie Y, Wu X-L. 2018. Shifts of  
598 the indigenous microbial communities from reservoir production water in crude oil- and  
599 asphaltene-degrading microcosms. *International Biodeterioration & Biodegradation* 132:18-29.
- 600 8. Su SB, Dong H, Chai LJ, Zhang XT, Banat Ibrahim M, Wang ZL, Hou DJ, Zhang F, She YH. 2018. Dynamics  
601 of a microbial community during an effective boost MEOR trial using high-throughput sequencing.  
602 *RSC Advances* 8:690-697.
- 603 9. Gao P, Li G, Le J, Liu X, Liu F, Ma T. 2018. Succession of microbial communities and changes of  
604 incremental oil in a post-polymer flooded reservoir with nutrient stimulation. *Applied Microbiology*  
605 *and Biotechnology* 102:2007-2017.
- 606 10. Le JJ, Liu F, Zhang JY, Bai LL, Wang R, Liu XB, Hou ZW, Lin WX. 2014. A field test of activation  
607 indigenous microorganism for microbial enhanced oil recovery in reservoir after polymer flooding.  
608 *Acta Petrolei Sinica* 35:99-106.
- 609 11. Zhang F, She Y, Banat IM, Chai L, Yi S, Yu G, Hou D. 2014. Potential Microorganisms for Prevention of  
610 Paraffin Precipitation in a Hypersaline Oil Reservoir. *Energy & Fuels* 28:1191–1197.
- 611 12. Carlson HK, Hubert CRJ. 2019. Mechanisms and Monitoring of Oil Reservoir Souring Control by Nitrate  
612 or Perchlorate Injection, p 1-25. *In* McGenity TJ (ed), *Microbial Communities Utilizing Hydrocarbons*  
613 *and Lipids: Members, Metagenomics and Ecophysiology* doi:10.1007/978-3-319-60063-5\_17-1.  
614 Springer International Publishing, Cham.
- 615 13. Li XX, Yang T, Mbadinga SM, Liu JF, Yang SZ, Gu JD, Mu BZ. 2017. Responses of Microbial Community  
616 Composition to Temperature Gradient and Carbon Steel Corrosion in Production Water of Petroleum  
617 Reservoir. *Frontiers in Microbiology* 8.
- 618 14. Guan J, Xia L-P, Wang L-Y, Liu J-F, Gu J-D, Mu B-Z. 2013. Diversity and distribution of sulfate-reducing  
619 bacteria in four petroleum reservoirs detected by using 16S rRNA and *dsrAB* genes. *International*  
620 *Biodeterioration & Biodegradation* 76:58-66.
- 621 15. Okoro C, Ekun OA, Nwume MI, Lin J. 2016. Molecular analysis of microbial community structures in  
622 Nigerian oil production and processing facilities in order to access souring corrosion and  
623 methanogenesis. *Corros Sci* 103:242-254.
- 624 16. Kryachko Y. 2018. Novel approaches to microbial enhancement of oil recovery. *Journal of*  
625 *Biotechnology* 266:118-123.

- 626 17. Wang XT, Li XZ, Yu L, Huang LX, Xiu JL, Lin W, Zhang YM. 2019. Characterizing the microbiome in  
627 petroleum reservoir flooded by different water sources. *Science of The Total Environment* 653:872–  
628 885.
- 629 18. Kim DD, O'Farrell C, Toth CRA, Montoya O, Gieg LM, Kwon TH, Yoon S. 2018. Microbial community  
630 analyses of produced waters from high-temperature oil reservoirs reveal unexpected similarity  
631 between geographically distant oil reservoirs. *Microb Biotechnol* 11:788-796.
- 632 19. Vigneron A, Alsop EB, Lomans BP, Kyripides NC, Head IM, Tsesmetzis N. 2017. Succession in the  
633 petroleum reservoir microbiome through an oil field production lifecycle. *The Isme Journal* 11:2141.
- 634 20. Zhou L, Lu Y-W, Wang D-W, Zhang S-L, Tang E-G, Qi Z-Z, Xie S-N, Wu J, Liang B, Liu J-F, Yang S-Z, Zhang  
635 J, Gu J-D, Mu B-Z. 2020. Microbial community composition and diversity in production water of a  
636 high-temperature offshore oil reservoir assessed by DNA- and RNA-based analyses. *International  
637 Biodeterioration & Biodegradation* 151:104970.
- 638 21. Song ZY, Zhi Y, Zhao FM, Sun GZ, Zhu WY. 2017. Wellhead Samples of High-Temperature,  
639 Low-Permeability Petroleum Reservoirs Reveal the Microbial Communities in Wellbores. *Energy &  
640 Fuels* 31.
- 641 22. Piceno YM, Reid FC, Tom LM, Conrad ME, Bill M, Hubbard CG, Fouke BW, Graff CJ, Han J, Stringfellow  
642 WT, Hanlon JS, Hu P, Hazen TC, Andersen GL. 2014. Temperature and injection water source influence  
643 microbial community structure in four Alaskan North Slope hydrocarbon reservoirs. *Frontiers in  
644 Microbiology* 5:409.
- 645 23. Xiao M, Sun SS, Zhang ZZ, Wang JM, Qiu LW, Sun HY, Song ZZ, Zhang BY, Gao DL, Zhang GQ, Wu WM.  
646 2016. Analysis of bacterial diversity in two oil blocks from two low-permeability reservoirs with high  
647 salinities. *SCI REP-UK* 6:19600.
- 648 24. Fathepure, Babu Z. 2014. Recent studies in microbial degradation of petroleum hydrocarbons in  
649 hypersaline environments. *Frontiers in Microbiology* 5:173.
- 650 25. Gao PK, Tian HM, Wang YS, Li YS, Li Y, Xie JX, Zeng B, Zhou JF, Li GQ, Ma T. 2016. Spatial isolation and  
651 environmental factors drive distinct bacterial and archaeal communities in different types of  
652 petroleum reservoirs in China. *SCI REP-UK* 6:20174.
- 653 26. Liu JF, Ma LJ, Mu BZ, Liu RL, Ni FT, Zhou JX. 2005. The field pilot of microbial enhanced oil recovery in  
654 a high temperature petroleum reservoir. *J Petrol Sci Eng* 48:265-271.
- 655 27. Wang XB, Xue YF, Yuan SQ, Huang ZY, Ma YH. 2015. Influences of microbial community structures and  
656 diversity changes by nutrients injection in Shengli oilfield, China. *J Petrol Sci Eng* 133:421-430.
- 657 28. Chai LJ, Fan Z, She YH, Banat IM, Hou DJ. 2015. Impact of a Microbial-Enhanced Oil Recovery Field  
658 Trial on Microbial Communities in a Low-Temperature Heavy Oil Reservoir. *Nat Environ Pollut Technol*  
659 14:455-462.
- 660 29. Yi L-N, Li Z-P, Liu L, Bi Y-Q, Wang X-T, Yi J-P. 2018. Functional microbial stimulation for oil recovery  
661 enhancement based on microbial community analysis. *Biotechnology & Biotechnological Equipment*  
662 32:1468-1476.
- 663 30. Ren HY, Xiong SZ, Gao GJ, Song YT, Cao GZ, Zhao LP, Zhang XJ. 2015. Bacteria in the injection water  
664 differently impacts the bacterial communities of production wells in high-temperature petroleum  
665 reservoirs. *Frontiers in Microbiology* 6:505.
- 666 31. Gao PK, Li GQ, Tian HM, Wang YS, Sun HW, Ma T. 2015. Differences in microbial community  
667 composition between injection and production water samples of water flooding petroleum reservoirs.  
668 *Biogeosciences* 12:3403-3414.
- 669 32. Lewin A, Johansen J, Wentzel A, Kotlar HK, Drablos F, Valla S. 2014. The microbial communities in two

- 670            apparently physically separated deep subsurface oil reservoirs show extensive DNA sequence  
671            similarities. *Environ Microbiol* 16:545-58.
- 672    33.        Deng Y, Jiang Y-H, Yang Y, He Z, Luo F, Zhou J. 2012. Molecular ecological network analyses. *BMC*  
673            *Bioinformatics* 13:113.
- 674    34.        Banerjee S, Walder F, Büchi L, Meyer M, Held AY, Gattinger A, Keller T, Charles R, van der Heijden  
675            MGA. 2019. Agricultural intensification reduces microbial network complexity and the abundance of  
676            keystone taxa in roots. *ISME J* 13:1722-1736.
- 677    35.        Wei G, Li M, Shi W, Tian R, Chang C, Wang Z, Wang N, Zhao G, Gao Z. 2020. Similar drivers but  
678            different effects lead to distinct ecological patterns of soil bacterial and archaeal communities. *Soil*  
679            *Biol Biochem* 144:107759.
- 680    36.        Berry D, Widder S. 2014. Deciphering microbial interactions and detecting keystone species with  
681            co-occurrence networks. *Front Microbiol* 5:219.
- 682    37.        Li Yu, Li Yan, Ma Ting, Peike G. 2020. Chromosomal integration of red fluorescent protein gene in  
683            rhamnolipids-producer *Pseudomonas aeruginosa* SG and its  
684            application in petroleum reservoir. *Microbiology China* 47:10.
- 685    38.        Albuquerque L, Tiago I, Veríssimo A, da Costa MS. 2006. *Tepidimonas thermarum* sp. nov., a new  
686            slightly thermophilic betaproteobacterium isolated from the Elisenquelle in Aachen and emended  
687            description of the genus *Tepidimonas*. *Systematic and Applied Microbiology* 29:450-456.
- 688    39.        Kampfer, P. 2005. *Hydrogenophaga defluvii* sp. nov. and *Hydrogenophaga atypica* sp. nov., isolated  
689            from activated sludge. *International Journal of Systematic & Evolutionary Microbiology* 55:341.
- 690    40.        Fida TT, Gassara F, Voordouw G. 2017. Biodegradation of isopropanol and acetone under denitrifying  
691            conditions by *Thauera* sp. TK001 for nitrate-mediated microbially enhanced oil recovery. *Journal of*  
692            *Hazardous Materials* 334:68-75.
- 693    41.        Liu Y, Balkwill DL, Aldrich HC, Drake GR, Boone DR. 1999. Characterization of the anaerobic  
694            propionate-degrading syntrophs *Smithella propionica* gen. nov., sp. nov. and *Syntrophobacter wolinii*.  
695            *Intj Syst Bacteriol* 47:545-556.
- 696    42.        Reinhold-Hurek B, Hurek T, Gillis M, Hoste B, Vancanneyt M, Kersters K, De Ley J. 1993. *Azoarcus* gen.  
697            nov., Nitrogen-Fixing Proteobacteria Associated with Roots of Kallar Grass (*Leptochloa fusca* (L.)  
698            Kunth), and Description of Two Species, *Azoarcus indigenus* sp. nov. and *Azoarcus communis* sp. nov.  
699            *International Journal of Systematic Bacteriology* 43:574-584.
- 700    43.        Aizawa S-I. 2014. Chapter 21 - *Rhodobacter sphaeroides* — A Resourceful Little Bug, p 66-68. *In*  
701            Aizawa S-I (ed), *The Flagellar World* doi:<https://doi.org/10.1016/B978-0-12-417234-0.00021-9>.  
702            Academic Press.
- 703    44.        Du C, Webb C. 2011. 2.03 - Cellular Systems, p 11-23. *In* Moo-Young M (ed), *Comprehensive*  
704            *Biotechnology (Second Edition)* doi:<https://doi.org/10.1016/B978-0-08-088504-9.00080-5>. Academic  
705            Press, Burlington.
- 706    45.        Zhang F, Qian D-K, Wang X-B, Dai K, Wang T, Zhang W, Zeng RJ. 2020. Stimulation of methane  
707            production from benzoate with addition of carbon materials. *Science of The Total Environment*  
708            723:138080.
- 709    46.        Gao PK, Tian HM, Li GQ, Sun HW, Ma T. 2015. Microbial diversity and abundance in the Xinjiang  
710            Luliang long-term water-flooding petroleum reservoir. *Microbiologyopen* 4:332-342.
- 711    47.        Dahle H, Birkeland NK. 2006. *Thermovirga lienii* gen. nov., sp. nov., a novel moderately thermophilic,  
712            anaerobic, amino-acid-degrading bacterium isolated from a North Sea oil well. *International Journal*  
713            *of Systematic & Evolutionary Microbiology* 56:1539-1545.

- 714 48. Dong H, Xia W, Dong H, She Y, Zhu P, Liang K, Zhang Z, Liang C, Song Z, Sun S, Zhang G. 2016.  
715 Rhamnolipids Produced by Indigenous *Acinetobacter junii* from Petroleum Reservoir and its Potential  
716 in Enhanced Oil Recovery. *Frontiers in Microbiology* 7.
- 717 49. Xia WJ, Dong HP, Yu L, Yu DF. 2011. Comparative study of biosurfactant produced by microorganisms  
718 isolated from formation water of petroleum reservoir. *Colloid Surface A* 392:124-130.
- 719 50. Liu YC, Whitman W. B. 2008. Metabolic, Phylogenetic, and Ecological Diversity of the Methanogenic  
720 Archaea. *Ann NY Acad Sci* 1125:171-189.
- 721 51. Lomans, Bart, P., Maas, Ronald. 1999. Isolation and characterization of Methanomethylovorans  
722 *hollandica* gen. nov., sp. nov., isolated. *Applied & Environmental Microbiology*.
- 723 52. Wadhams, George, H., Armitage, Judith, P. 2004. Making sense of it all: bacterial chemotaxis. *Nature*  
724 *Reviews Molecular Cell Biology*.
- 725 53. van Wolferen M, Orell A, Albers S-V. 2018. Archaeal biofilm formation. *Nature Reviews Microbiology*  
726 16:699-713.
- 727 54. Szurmant H, Ordal GW. 2004. Diversity in chemotaxis mechanisms among the bacteria and archaea.  
728 *Microbiol Mol Biol Rev* 68:301-19.
- 729 55. Jiang M, Shao W, Perego M, Hoch JA. 2000. Multiple histidine kinases regulate entry into stationary  
730 phase and sporulation in *Bacillus subtilis*. *Mol Microbiol* 38:535-42.
- 731 56. Lyon GJ, Novick RP. 2004. Peptide signaling in *Staphylococcus aureus* and other Gram-positive  
732 bacteria. *Peptides* 25:1389-1403.
- 733 57. Tang YQ, Li Y, Zhao JY, Chi CQ, Huang LX, Dong HP, Wu XL. 2012. Microbial communities in long-term,  
734 water-flooded petroleum reservoirs with different in situ temperatures in the Huabei Oilfield, China.  
735 *Plos One* 7:e33535.
- 736 58. Auguet JC, Barberan A, Casamayor EO. 2010. Global ecological patterns in uncultured Archaea. *ISME J*  
737 4:182-90.
- 738 59. Lauber CL, Hamady M, Knight R, Fierer N. 2009. Pyrosequencing-based assessment of soil pH as a  
739 predictor of soil bacterial community structure at the continental scale. *Appl Environ Microbiol*  
740 75:5111-20.
- 741 60. Lenchi N, Inceoğlu Ö, Kebbouche-Gana S, Gana ML, Llíros M, Servais P, García-Armisen T. 2013.  
742 Diversity of Microbial Communities in Production and Injection Waters of Algerian Oilfields Revealed  
743 by 16S rRNA Gene Amplicon 454 Pyrosequencing. *PLoS ONE* 8:e66588.
- 744 61. Bolyen E, Rideout JR, Dillon MR, Bokulich NA, Abnet C, Al-Ghalith GA, Alexander H, Alm EJ, Arumugam  
745 M, Asnicar F, Bai Y, Bisanz JE, Bittinger K, Brejnrod A, Brislawn CJ, Brown CT, Callahan BJ,  
746 Caraballo-Rodríguez AM, Chase J, Cope E, Da Silva R, Dorrestein PC, Douglas GM, Durall DM, Duvallet  
747 C, Edwardson CF, Ernst M, Estaki M, Fouquier J, Gauglitz JM, Gibson DL, Gonzalez A, Gorlick K, Guo J,  
748 Hillmann B, Holmes S, Holste H, Huttenhower C, Huttley G, Janssen S, Jarmusch AK, Jiang L, Kaehler B,  
749 Kang KB, Keefe CR, Keim P, Kelley ST, Knights D, Koester I, Kosciulek T, et al. 2018. QIIME 2:  
750 Reproducible, interactive, scalable, and extensible microbiome data science. *PeerJ Preprints*  
751 6:e27295v2.
- 752 62. Edgar RC. 2013. UPARSE: highly accurate OTU sequences from microbial amplicon reads. *Nat Meth*  
753 10:996-998.
- 754 63. Wang Q, Garrity GM, Tiedje JM, Cole JR. 2007. Naïve Bayesian Classifier for Rapid Assignment of rRNA  
755 Sequences into the New Bacterial Taxonomy. *Appl Environ Microbiol* 73:5261-5267.
- 756 64. Aßhauer KP, Wemheuer B, Daniel R, Meinicke P. 2015. Tax4Fun: predicting functional profiles from  
757 metagenomic 16S rRNA data. *Bioinformatics (Oxford, England)* 31:2882-2884.

- 758 65. Parks DH, Tyson GW, Hugenholtz P, Beiko RG. 2014. STAMP: statistical analysis of taxonomic and  
759 functional profiles. *Bioinformatics* 30:3123-3124.
- 760 66. Shannon P, Markiel A, Ozier O, Baliga NS, Wang JT, Ramage D, Amin N, Schwikowski B, Ideker T. 2003.  
761 Cytoscape: a software environment for integrated models of biomolecular interaction networks.  
762 *Genome Res* 13:2498-2504.  
763  
764

765 **Figure captions**

766 **Fig. 1** Diagrammatic sketch of the location of the sampled petroleum reservoir block (a), the  
767 water-injection facilities and oil-production wells (b and c). The injected water flows from  
768 combined injection station (a, g, and j) to water injection station (b, c, h, and k), and then to  
769 water-injection wells and oil production wells of reservoir block (d, e, f, i, and l)

770 **Fig. 2** The alpha diversity (a) and beta diversity (b) of the bacterial and archaeal communities  
771 from the water-injection facilities and oil-production wells, and (c) the relationships between  
772 the community compositions with the environmental variables. PCoA was performed based  
773 on Weighted-UniFrac dissimilarity matrixes. Canonical correspondence analysis (CCA) and  
774 Monte Carlo permutation test were performed to reveal the correlations between  
775 environmental variables and community compositions.

776 **Fig. 3** Heatmaps (a) and Wilcoxon rank-sum test (b) showing the distinct distribution of  
777 dominant bacterial populations through the water-injection facilities and oil-production wells

778 **Fig. 4** Heatmaps (a) and Wilcoxon rank-sum test (b) showing the distinct distribution of  
779 dominant archaeal populations through the water-injection facilities and oil-production wells

780 **Fig. 5** Distinct metabolic profiles and the statistically significant differences among the  
781 bacterial (a) and archaeal (b) communities through wellheads and downhole of the  
782 water-injection wells and the oil-production wells. The ordination graph showed that the  
783 samples with similar metabolic profiles were clustered together, otherwise, formed distinct  
784 clusters. The bar charts show the differences between the proportions of sequences in each  
785 group with a confidence interval of 95%

786 **Fig. 6** Co-occurrence networks and topological properties of the bacterial and archaeal  
787 communities through wellheads (a) and downhole (b) of the water-injection wells and the  
788 oil-production wells (c). Nodes are colored according to microbial class, and the nodes with a  
789 larger size show the potential keystone OTUs. The taxonomic information for the numbered

790 nodes and the potential keystone OTUs is listed in Table S4. Edges indicate correlations  
791 among nodes, and the red and green edges represent positive and negative correlations,  
792 respectively

793 **Fig. 7** Correlations of the bacterial (a) and archaeal (b) communities inhabiting in the  
794 water-injection facilities and oil-production wells, (c) the distribution of shared bacterial  
795 OTUs between wellheads and downhole of the injection wells, and downhole of the injection  
796 wells and oil-production wells, and (d) the correlations with stratal permeability of the oil  
797 production wells.

798



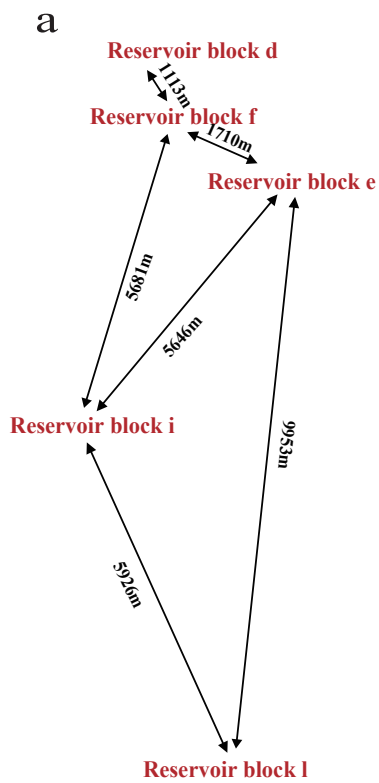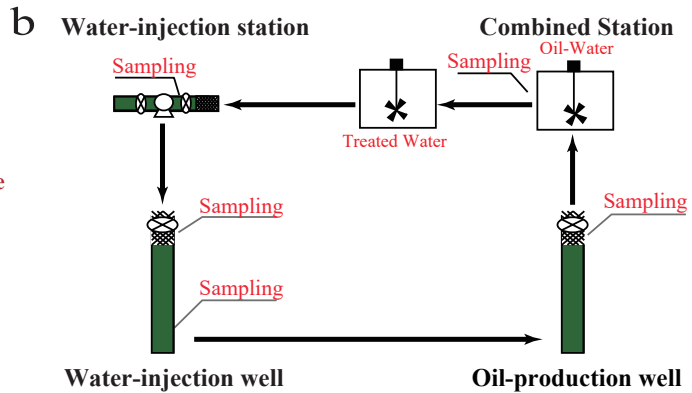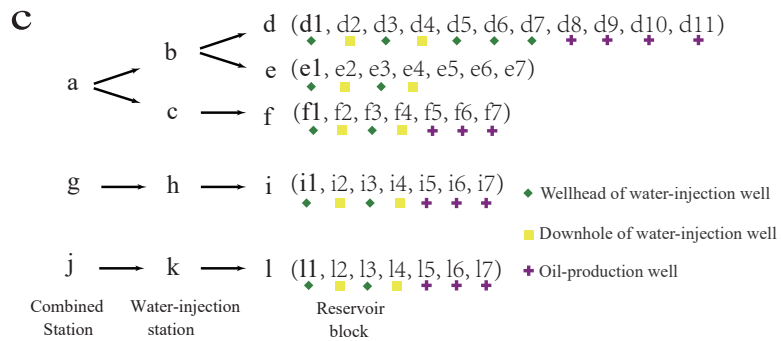

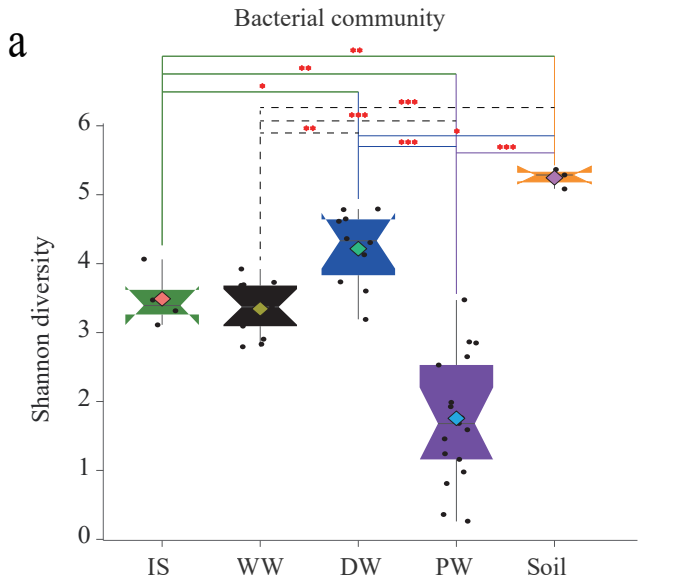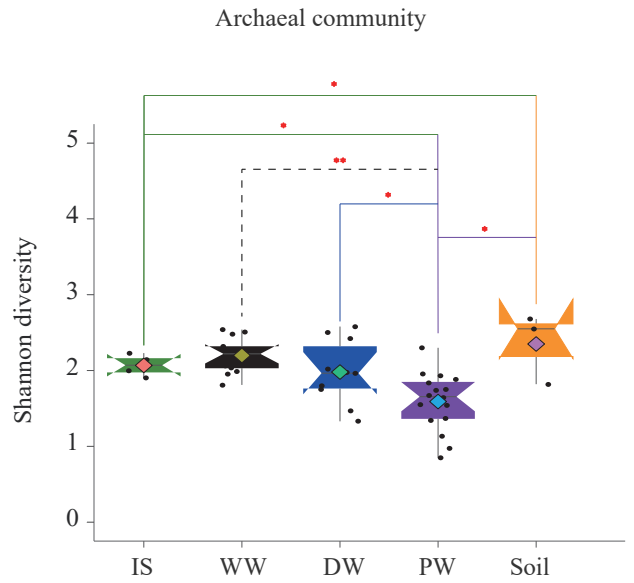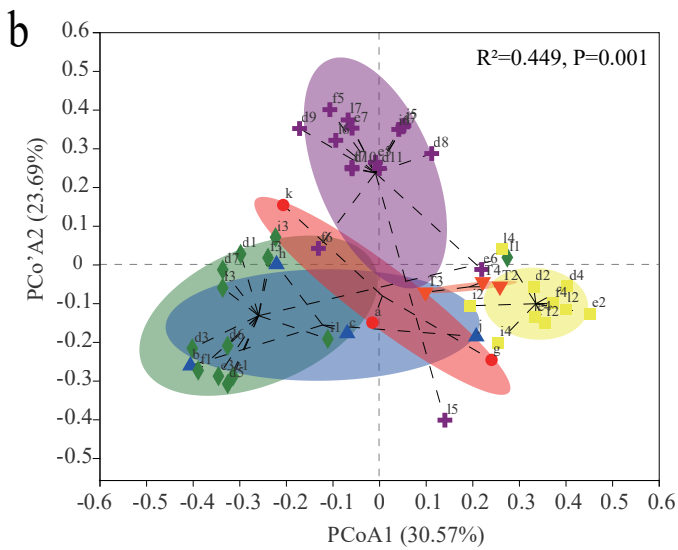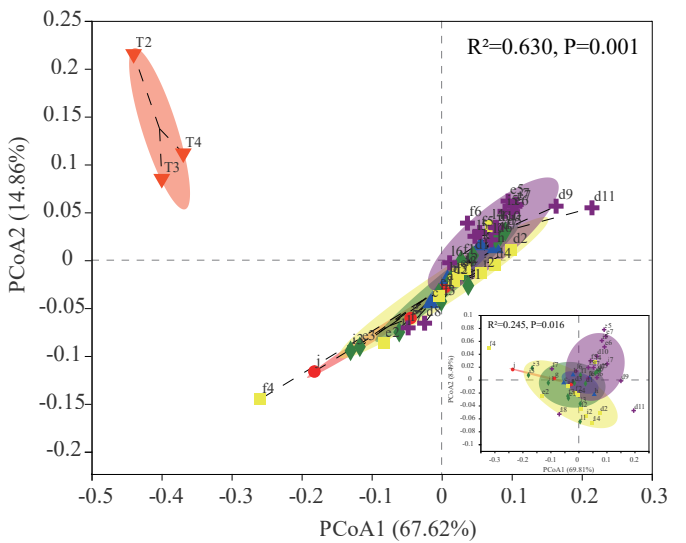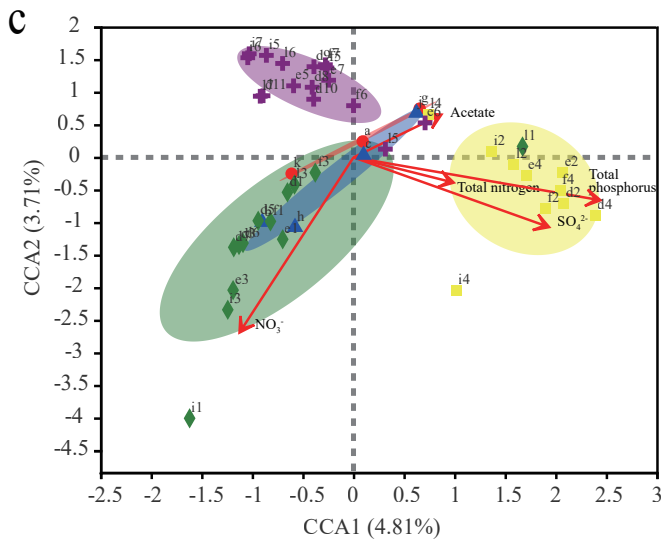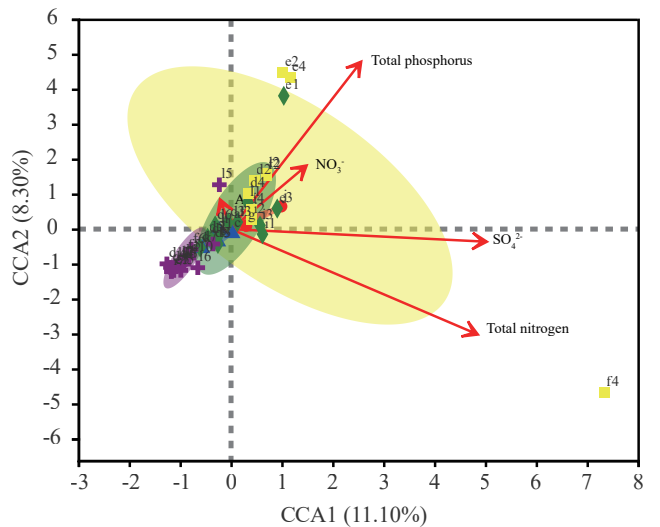

● CS Combined station   
 ▲ IS Water-injection station   
 ◆ WW Wellhead of water-injection well   
 ■ DW Downhole of water-injection well   
 + PW Oil-production well

a

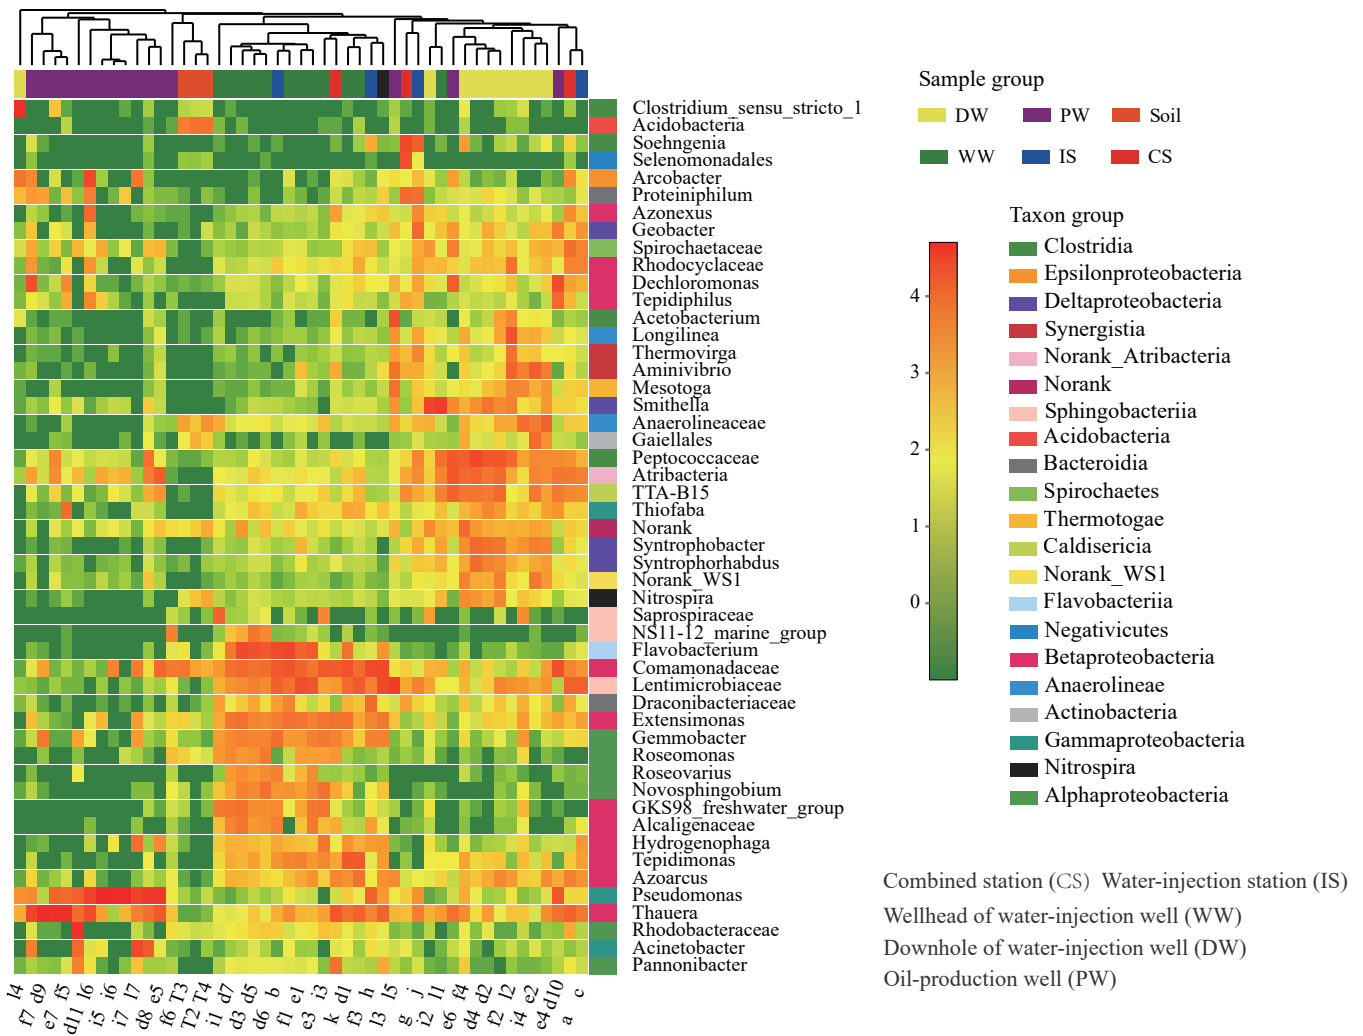

b

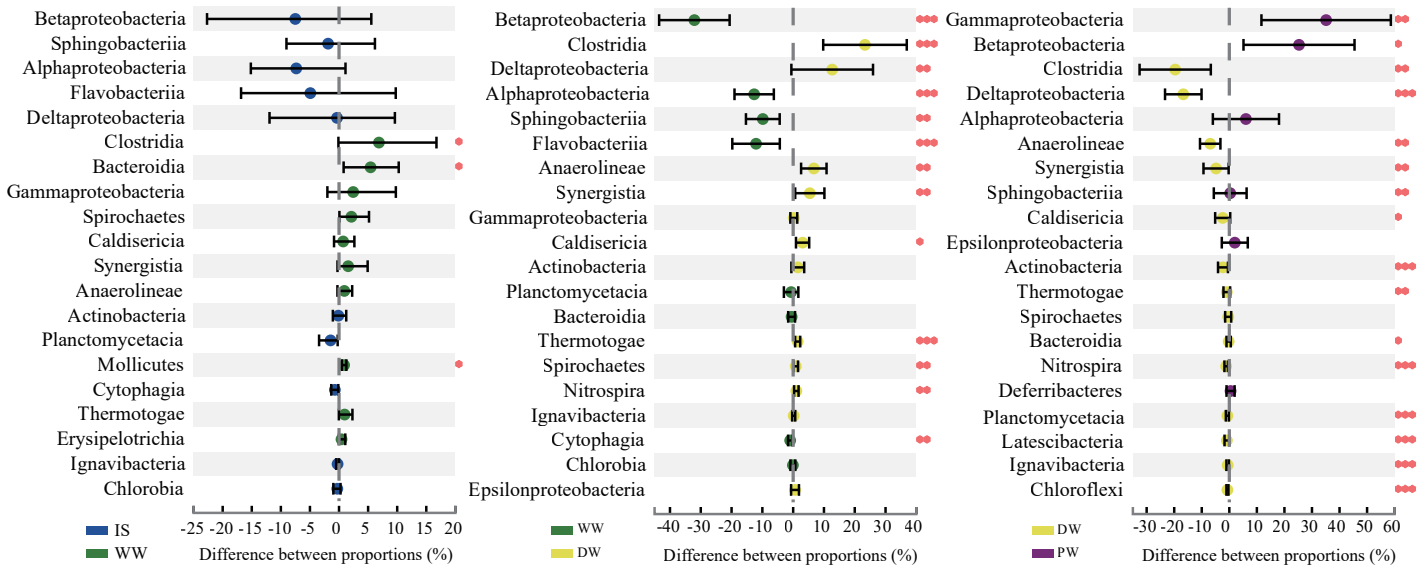

a

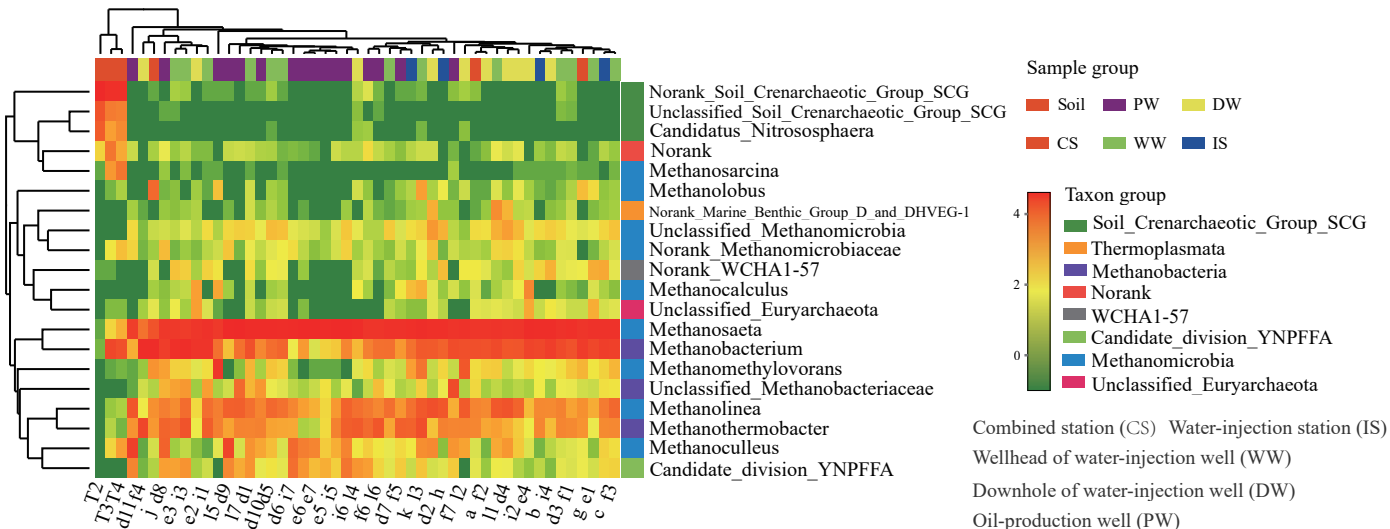

b

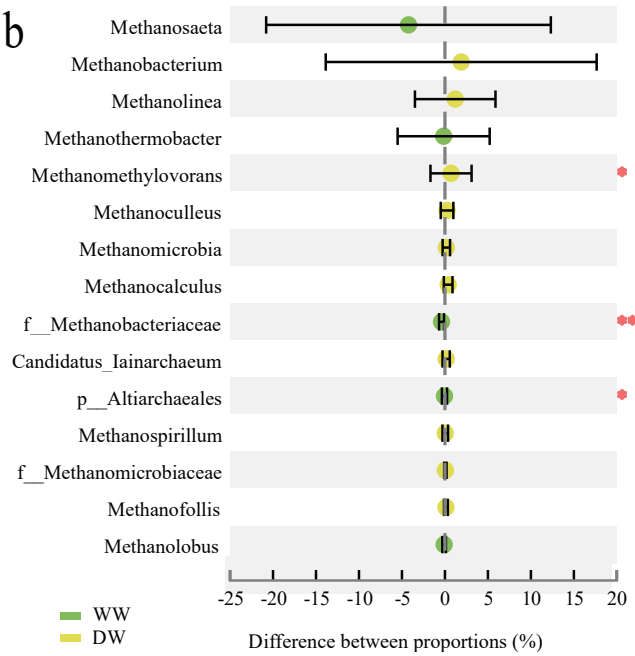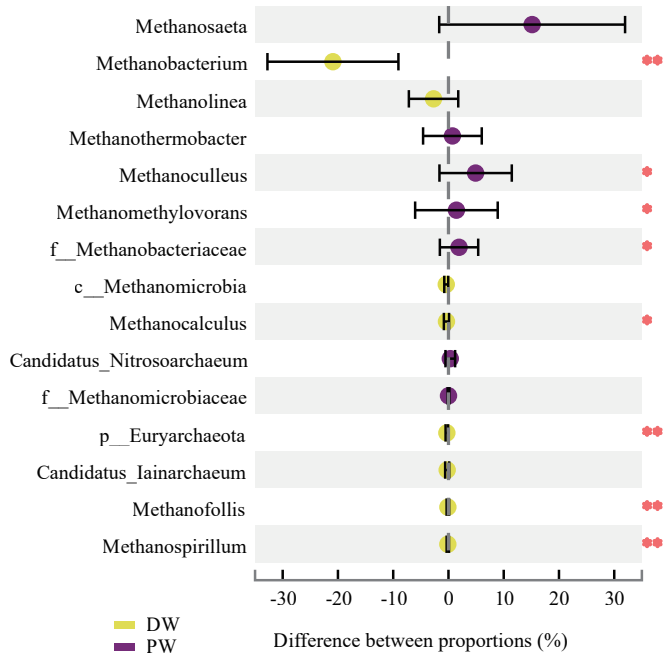

a

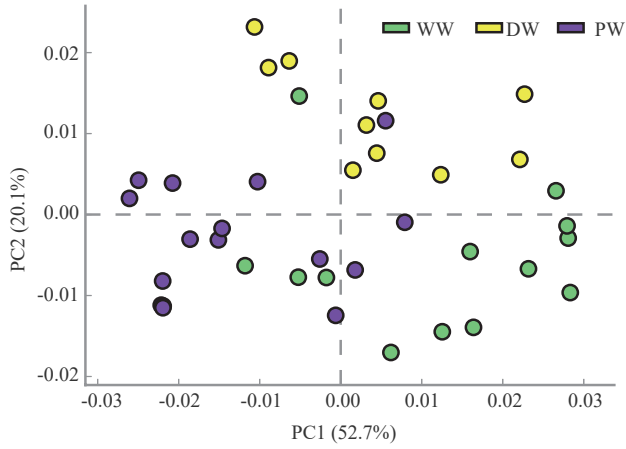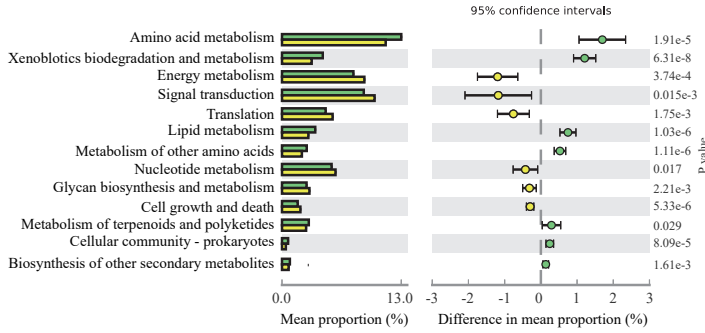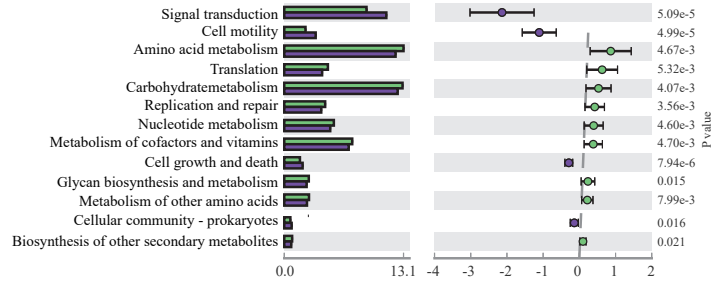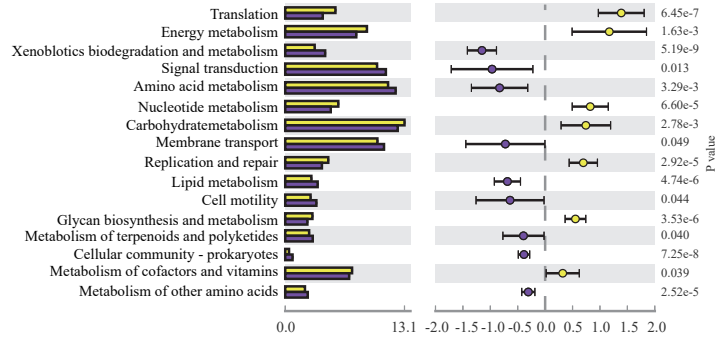

b

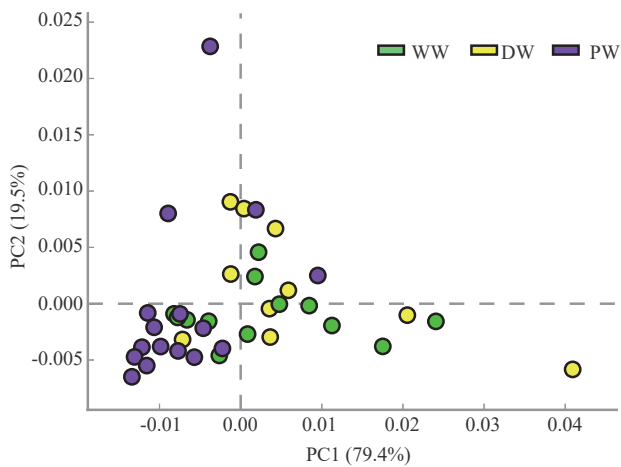

Wellhead of water-injection well (WW)    Downhole of water-injection well (DW)    Oil-production well (PW)

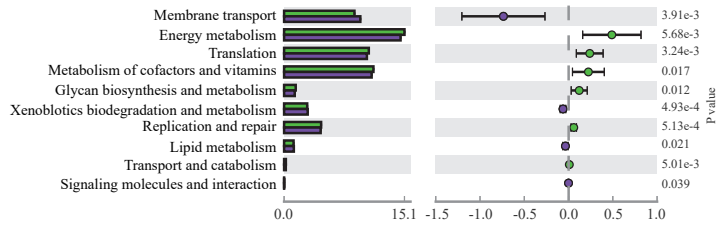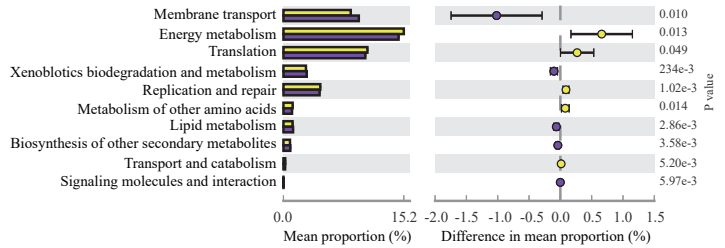

**a Wellhead of water-injection well**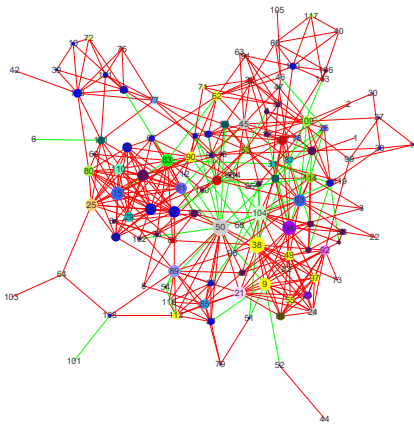**b Downhole of water-injection well**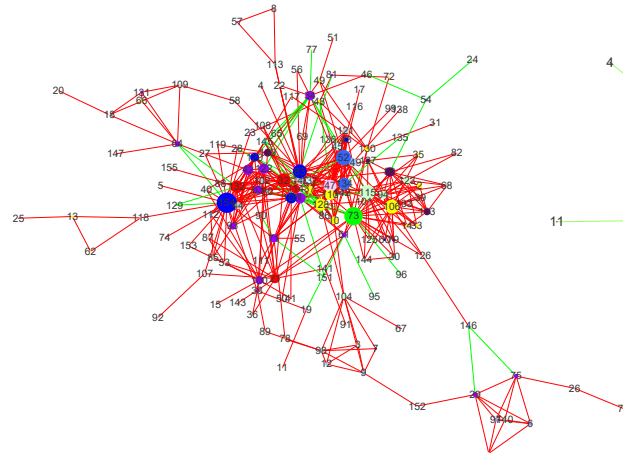**c Oil-production well**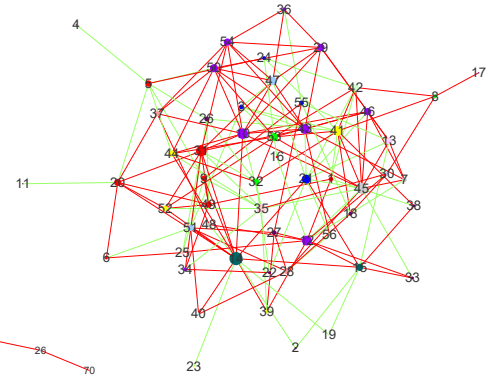

| Network properties             | Wellhead of water-injection well | Downhole of water-injection well | Oil-production well |
|--------------------------------|----------------------------------|----------------------------------|---------------------|
| Similarity threshold           | 0.81                             | 0.98                             | 0.81                |
| R square of power-law          | 0.463                            | 0.863                            | 0.197               |
| Total nodes                    | 121                              | 155                              | 56                  |
| Total links                    | 424                              | 455                              | 168                 |
| Positive edges                 | 372                              | 416                              | 109                 |
| Negative edges                 | 52                               | 39                               | 59                  |
| Average degree                 | 7.008                            | 5.871                            | 6                   |
| Average path distance          | 3.082                            | 3.519                            | 2.501               |
| Average clustering coefficient | 0.427                            | 0.392                            | 0.249               |
| Connectedness                  | 1                                | 0.949                            | 1                   |
| Centralization of degree       | 0.102                            | 0.165                            | 0.17                |
| Centralization of betweenness  | 0.107                            | 0.194                            | 0.153               |
| Modularity                     | 0.355                            | 0.613                            | 0.568               |
| Number of module               | 3                                | 10                               | 6                   |

Node colore

**Alphaproteobacteria** **Gammaproteobacteria** **Flavobacteriia** **Clostridia** **Anaerolineae** **Deferribacteres** **Nitrospira** **Synergistia** **Spirochaetes**  
**Betaproteobacteria** **Deltaproteobacteria** **Bacteroidia** **Bacteroidetes** **Chlorobia** **Acidobacteria** **Phycisphaerae** **Planctomycetacia**  
**Epsilonproteobacteria** **Sphingobacteriia** **Dehalococcoidia** **Mollicutes** **Cytophagia** **Erysipelotrichia** **Fimbriimonadia**  
**Actinobacteria** **Thermotogae** **Cyanobacteria** **Ignavibacteria** **Caldisericia** **Chthonomonadetes** Norank at class level

Edge colore

**Positive correlation** **Negative correlation**

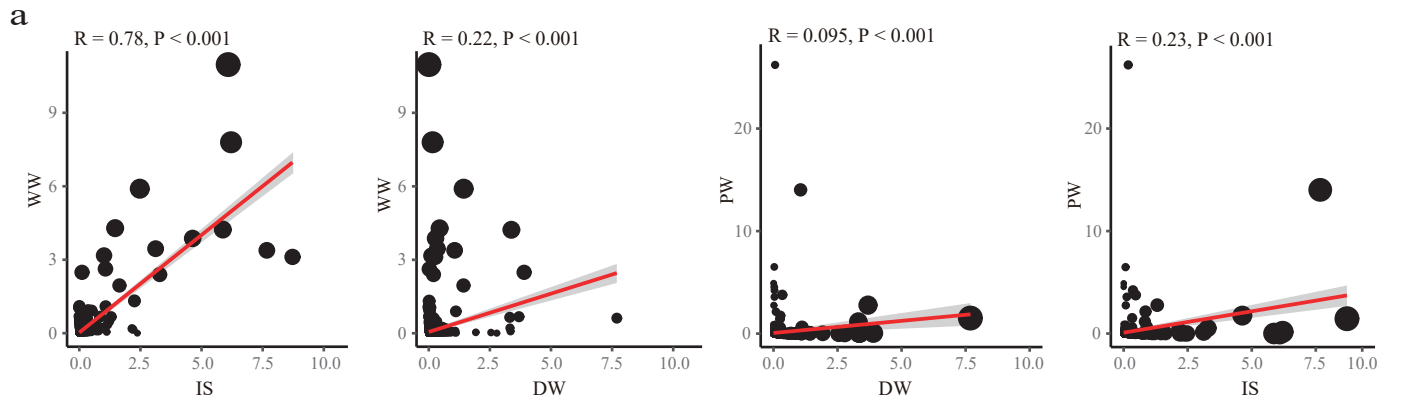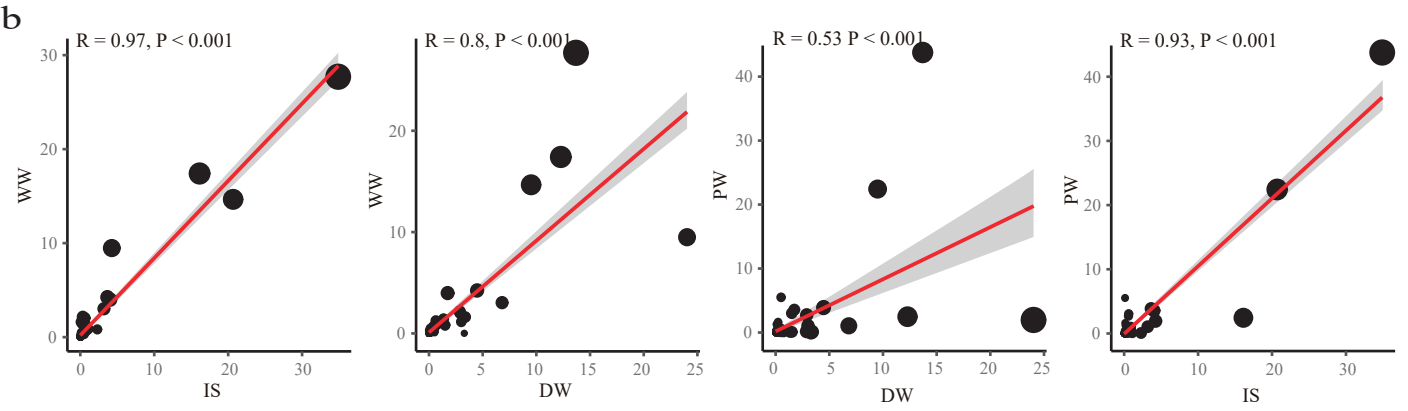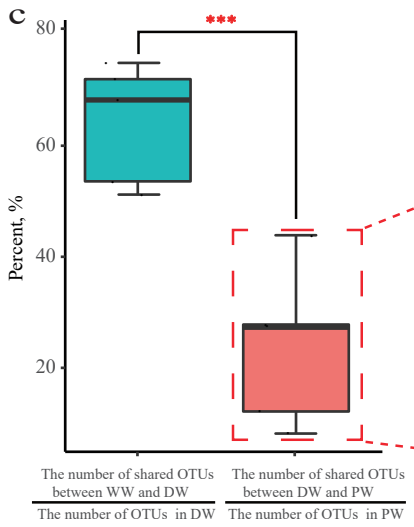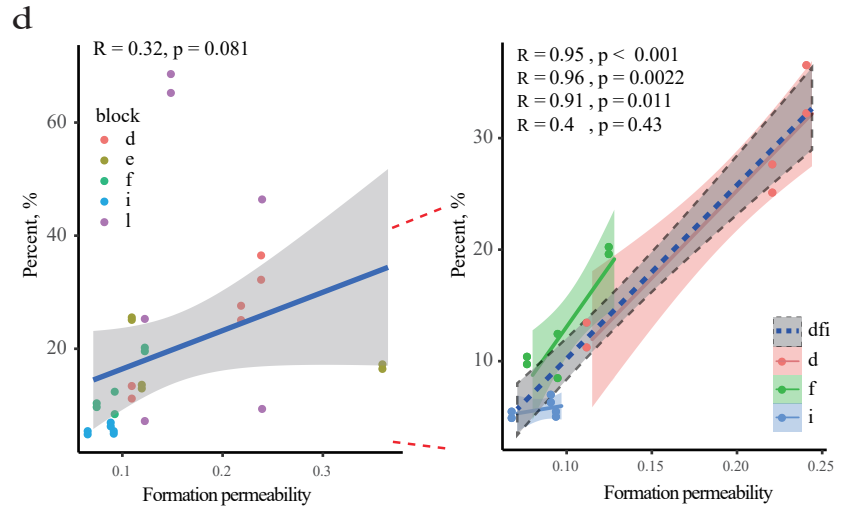

Water-injection station (IS)      Wellhead of water-injection well (WW)      Downhole of water-injection well (DW)      Oil-production well (PW)
